# Supplementary material for: Stimuli responsive gelation of tert-butylacetic acid based LMOGs – applications in remediation of marine oil spills, dye removal and heavy metal sensing
Source: Royal Society of Chemistry journal article supplement (doi:10.1039/d3sm00960b), 2023-01-01

## Supporting Information

### Stimuli responsive gelation of tert-butylacetic acid based LMOGs – applications in remediation of marine oil spill, dye removal and heavy metal sensing

Varsha Bhardwaj, Ajaykumar M, Patel, Amar Ballabh\*

---

*Department of Chemistry, Faculty of Science, The Maharaja Sayajirao University of Baroda,  
Vadodara-390002, Gujarat (INDIA).*

#### Contents –

1. Solvents utilized in gelation trials
2.  $T_{gel}$  vs. concentration plots
3. Calculation of  $\Delta H$  for aliphatic solvents
4. Toxic Dye Removal plots
5. Metal sensing studies
6. LOD and  $K_a$  values for all the heavy metals tested
7. NMR in presence of metal salts
8. FT-IR in presence of mercuric metal salts
9. Rheology
10. Comparative IR spectra of Compound **TBA1** with xerogel, gel solution phase (solvent used – n-octane)
11. Comparative PXRD patterns
12. Crystallographic parameters
13. Analytical Data
14.  $^1H$ ,  $^{13}C$ , FT-IR

### Solvents utilized in gelation trials

| Sr. | Solvent type | Nature    | Solvents                                                                                                                                                                                                                                                             |
|-----|--------------|-----------|----------------------------------------------------------------------------------------------------------------------------------------------------------------------------------------------------------------------------------------------------------------------|
| 1.  | Polar        | Protic    | Water<br>Methanol<br>Ethanol<br>Isopropanol<br>n-butanol<br>tert-butanol<br><b>propan-1,2-diol</b><br>hexan-1-ol<br>octan-2-ol<br>decan-1-ol<br>polyethylene glycol                                                                                                  |
| 2.  | Polar        | Aprotic   | Acetone<br>Ethyl acetate<br><b>Dimethyl Sulfoxide</b><br>Dimethyl Formamide<br>Acetonitrile<br>Tetrahydrofuran<br>Diethyl ether<br>Dibenzyl ether<br>Diisopropyl ether                                                                                               |
| 2.  | Halogenated  | Aprotic   | Chloroform<br>Dichloromethane<br>Carbon tetrachloride                                                                                                                                                                                                                |
| 3.  | Hydrocarbon  | Aliphatic | Petroleum ether<br>n-Hexane<br>n-Heptane<br><b>n-Octane</b><br><b>n-Decane</b><br><b>n-Dodecane</b><br><b>n-Hexadecane</b><br>Cyclohexane<br>Decalin<br>Petrol<br><b>Diesel</b><br><b>Kerosene</b><br><b>Engine oil</b><br><b>Cooking oil</b><br><b>Silicone oil</b> |
| 4.  | Aromatic     |           | Benzene<br>Toluene<br>Chlorobenzene                                                                                                                                                                                                                                  |

|    |          |                    | Bromobenzene<br>Nitrobenzene<br>Xylenes (o-,m-,p-)                                                                                                                                                                                                                                                                                                                                                                                                                                                                                                                                                                                                                                                                                                                                                                                                                                                                                                                        |
|----|----------|--------------------|---------------------------------------------------------------------------------------------------------------------------------------------------------------------------------------------------------------------------------------------------------------------------------------------------------------------------------------------------------------------------------------------------------------------------------------------------------------------------------------------------------------------------------------------------------------------------------------------------------------------------------------------------------------------------------------------------------------------------------------------------------------------------------------------------------------------------------------------------------------------------------------------------------------------------------------------------------------------------|
| 5. | Mixtures | Aliphatic+Aromatic | n-hexane + benzene (1:1)<br>n-heptane + benzene (1:1)<br>n-octane + benzene (1:1)<br>decane + benzene (1:1)<br>dodecane + benzene (1:1)<br>hexadecane + benzene (1:1)<br>n-hexane + toluene (1:1)<br>n-heptane + toluene (1:1)<br>n-octane + toluene (1:1)<br>decane + toluene (1:1)<br>dodecane + toluene (1:1)<br>hexadecane + toluene (1:1)<br>n-hexane + chlorobenzene (1:1)<br>n-heptane + chlorobenzene (1:1)<br>n-octane + chlorobenzene (1:1)<br>decane + chlorobenzene (1:1)<br>dodecane + chlorobenzene (1:1)<br>hexadecane + chlorobenzene (1:1)<br>n-hexane + bromobenzene (1:1)<br>n-heptane + bromobenzene (1:1)<br>n-octane + bromobenzene (1:1)<br>decane + bromobenzene (1:1)<br>dodecane + bromobenzene (1:1)<br>hexadecane + bromobenzene (1:1)<br>n-hexane + nitrobenzene (1:1)<br>n-heptane + nitrobenzene (1:1)<br>n-octane + nitrobenzene (1:1)<br>decane + nitrobenzene (1:1)<br>dodecane + nitrobenzene (1:1)<br>hexadecane + nitrobenzene (1:1) |

Table S1 List of solvents employed for gelation trials  
Solvents in bold gave gelation

### T<sub>gel</sub> vs. concentration plots

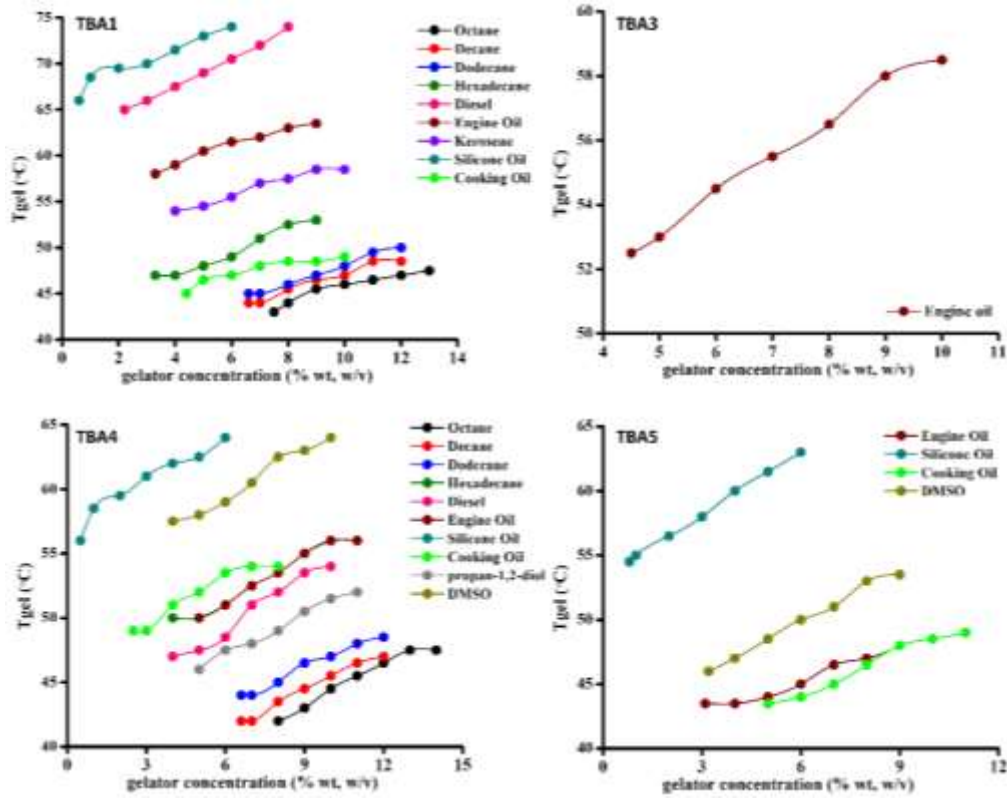

Figure S1 T<sub>gel</sub> vs. concentration plots for all gels

### Calculation of $\Delta H$ for aliphatic solvents

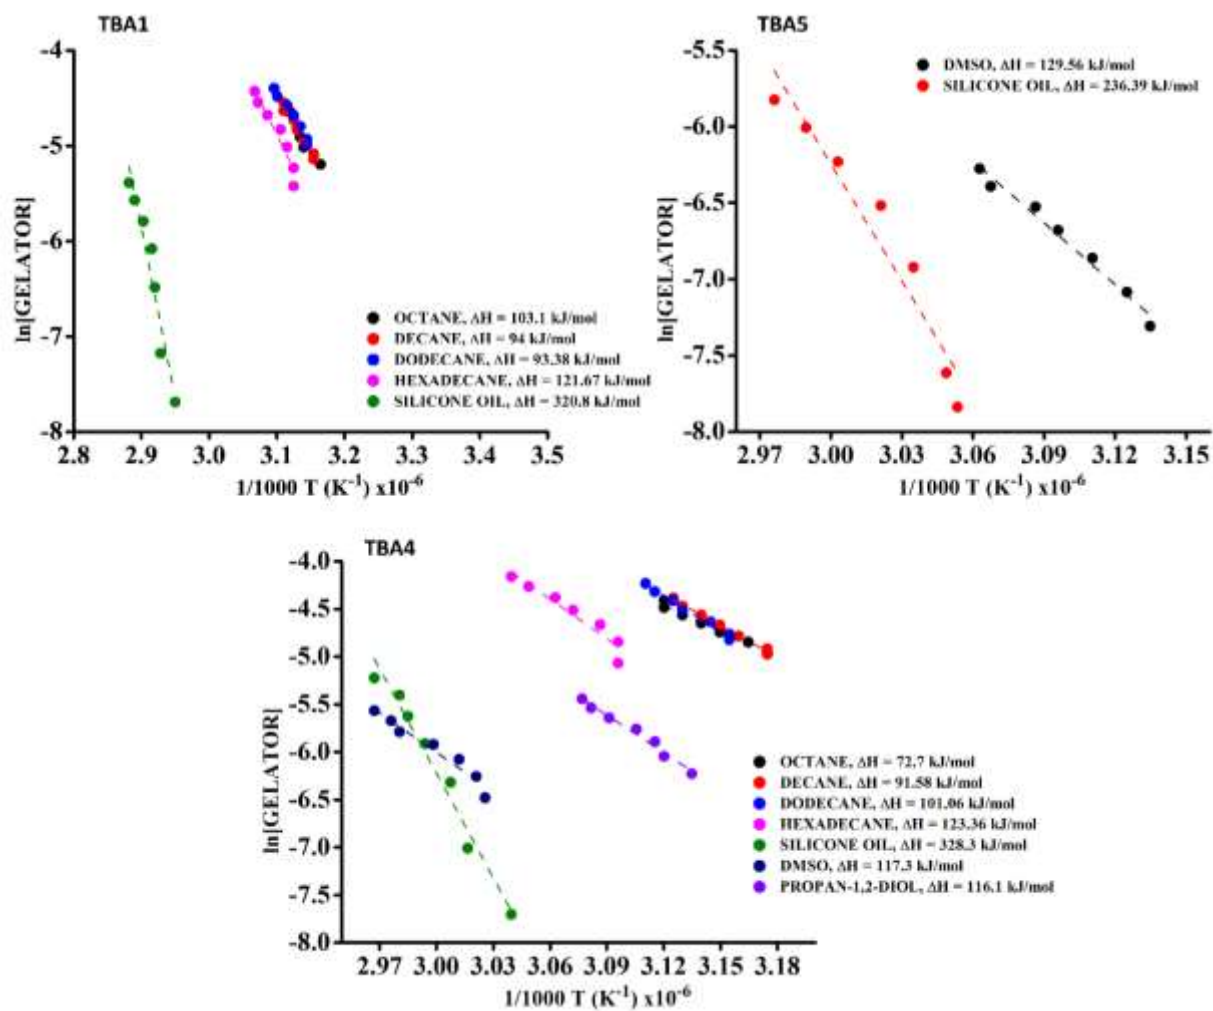

Figure S2  $\Delta H$  values for all gels

### Toxic Dye Removal plots

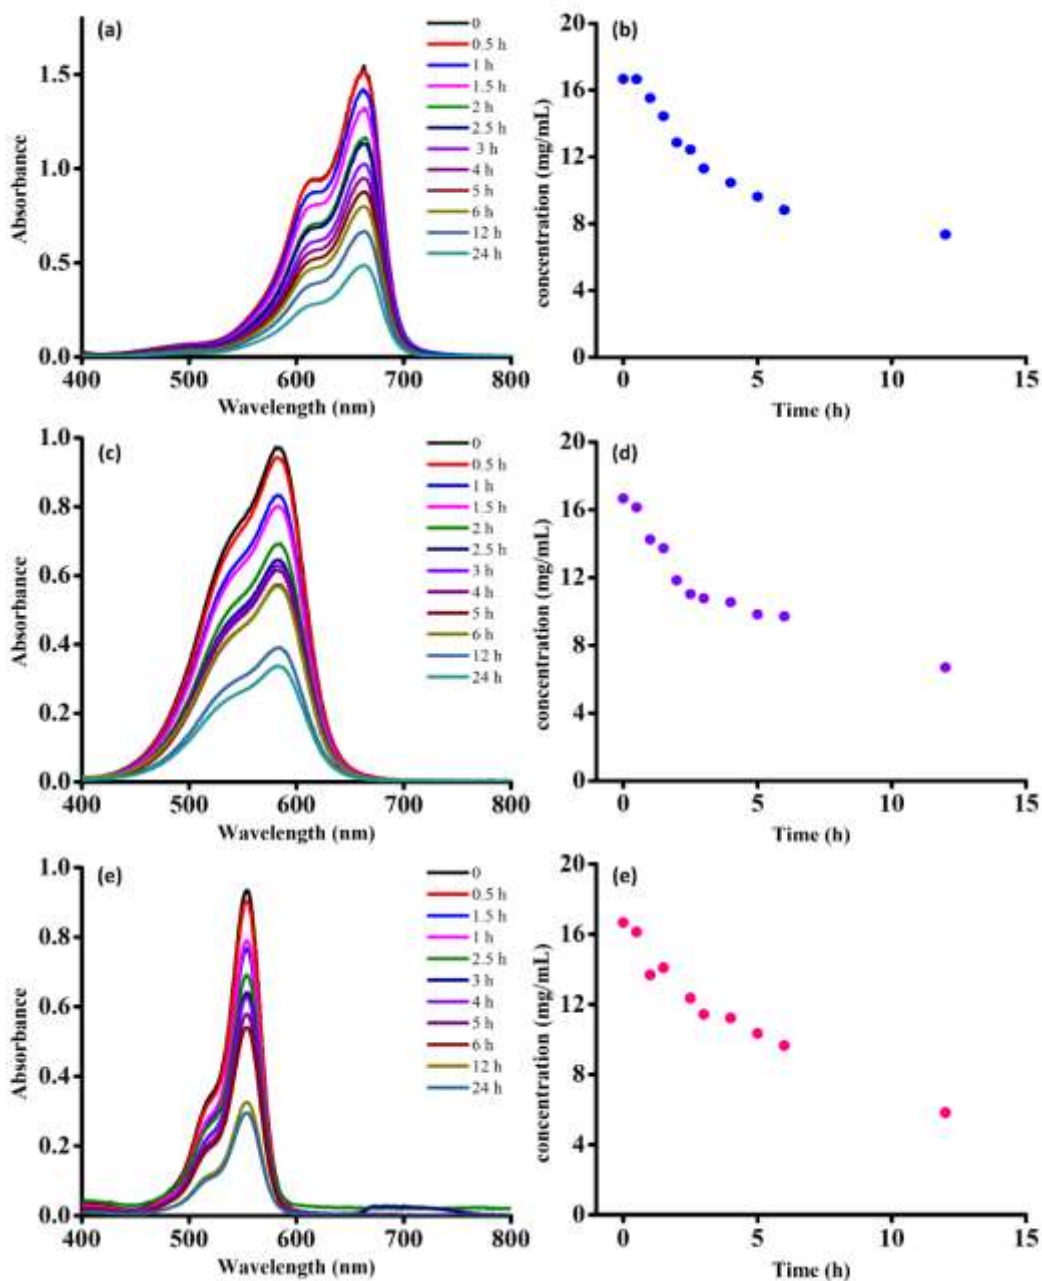

Figure S3 Time dependent absorption studies for **TBA4** in aqueous solution of 1.5 mL which contains (a) methylene blue dye at an initial concentration of 25mg/1.5 mL and (b) concentration-time correlation at 664 nm, (c) crystal violet dye at an initial concentration of 25mg/1.5 mL and (d) concentration-time correlation at 583 nm, (e) Rhodamine B dye at an initial concentration of 20mg/1.5mL, in presence of 1 mL of diesel congealed on the water surface using 5% w/v of **TBA4** and (f) its concentration-time correlation at 554 nm.

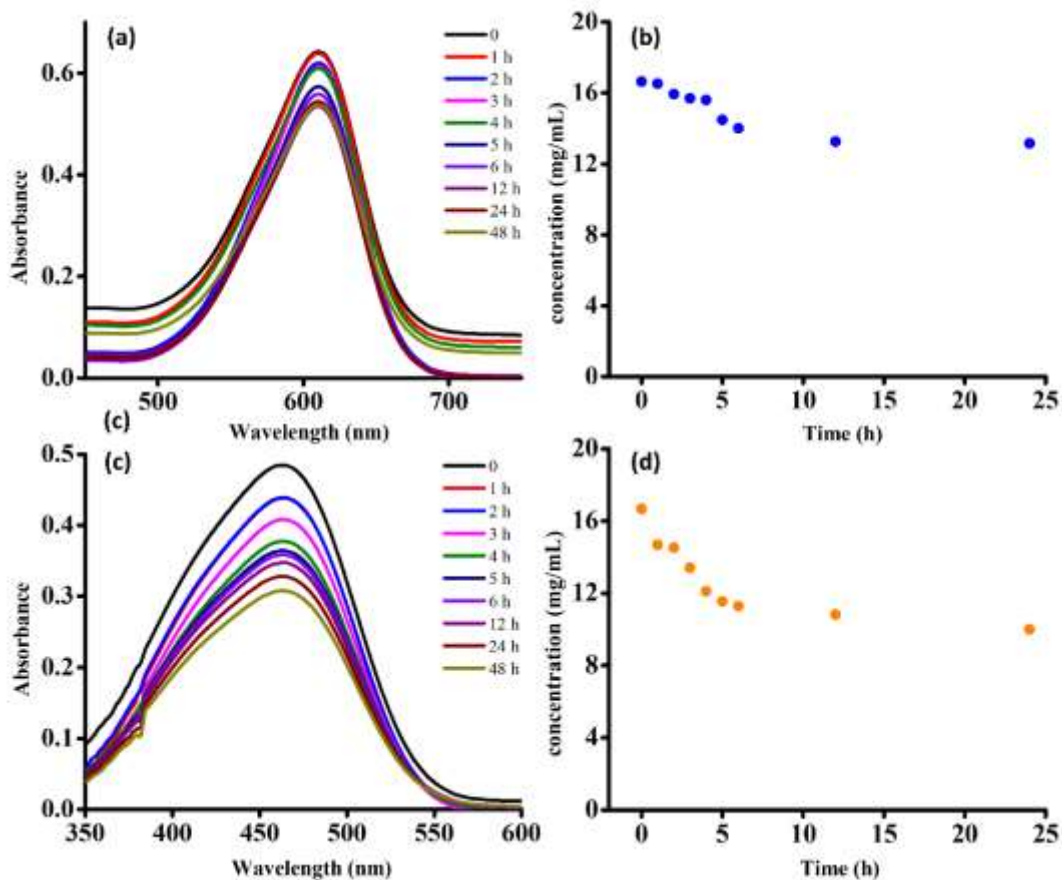

Figure S4 Time dependent absorption studies for **TBA1** in aqueous solution of 1.5 mL which contains (a) indigo carmine dye at an initial concentration of 25mg/1.5 mL and (b) concentration-time correlation at 610 nm, (c) methyl orange dye at an initial concentration of 25mg/1.5 mL, in presence of 1 mL of diesel congealed on the water surface using 5% w/v of **TBA1** and (d) its concentration-time correlation at 462 nm

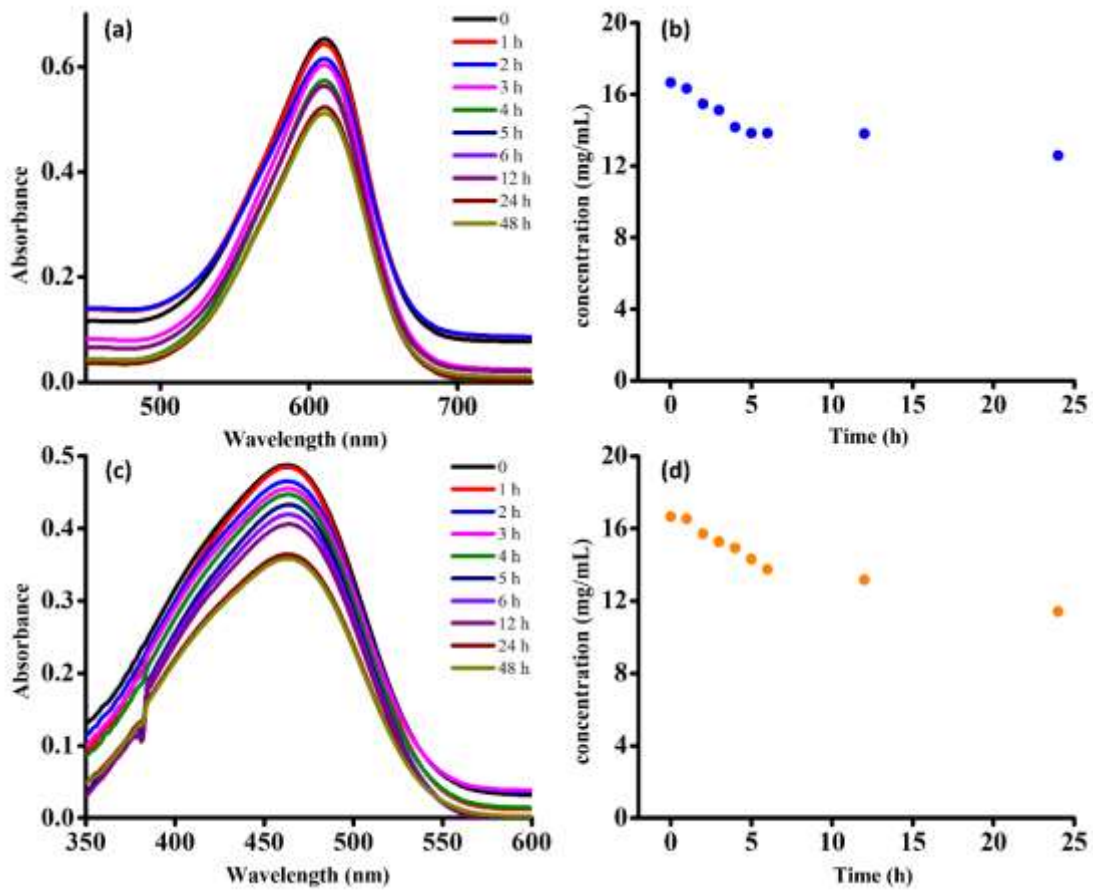

Figure S5 Time dependent absorption studies for **TBA4** in aqueous solution of 1.5 mL which contains (a) indigo carmine dye at an initial concentration of 25mg/1.5 mL and (b) concentration-time correlation at 610 nm, (c) methyl orange dye at an initial concentration of 25mg/1.5 mL, in presence of 1 mL of diesel congealed on the water surface using 5% w/v of **TBA4** and (d) its concentration-time correlation at 462 nm



## Metal sensing studies

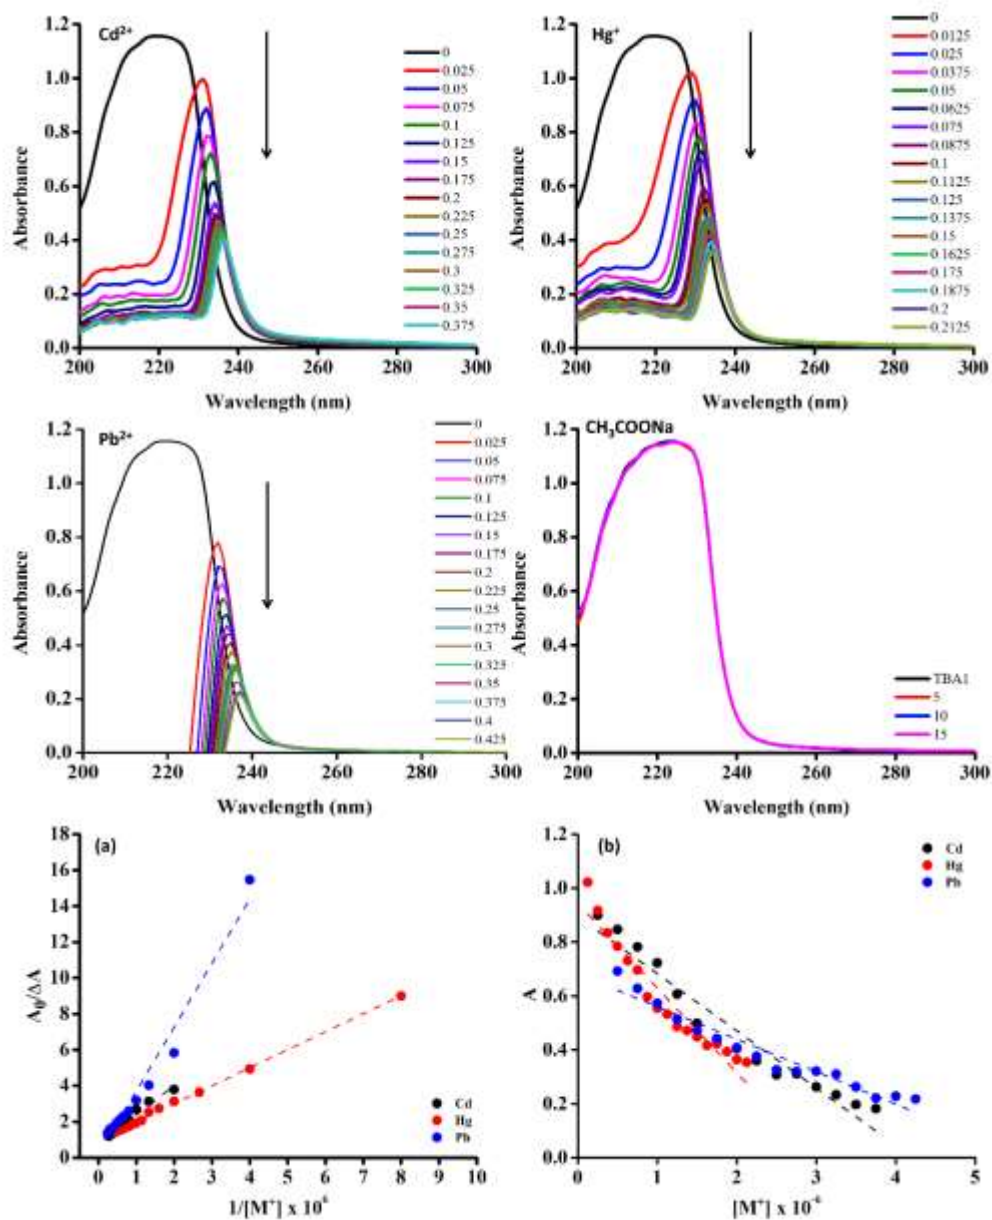

Figure S6 Change in absorbance of TBA1 with increasing concentrations of cadmium(II), mercury(II) and lead (II), control experiment with sodium acetate; (a) Benesi-Hildebrand plot and (b) detection limit of all metal ions with TBA1

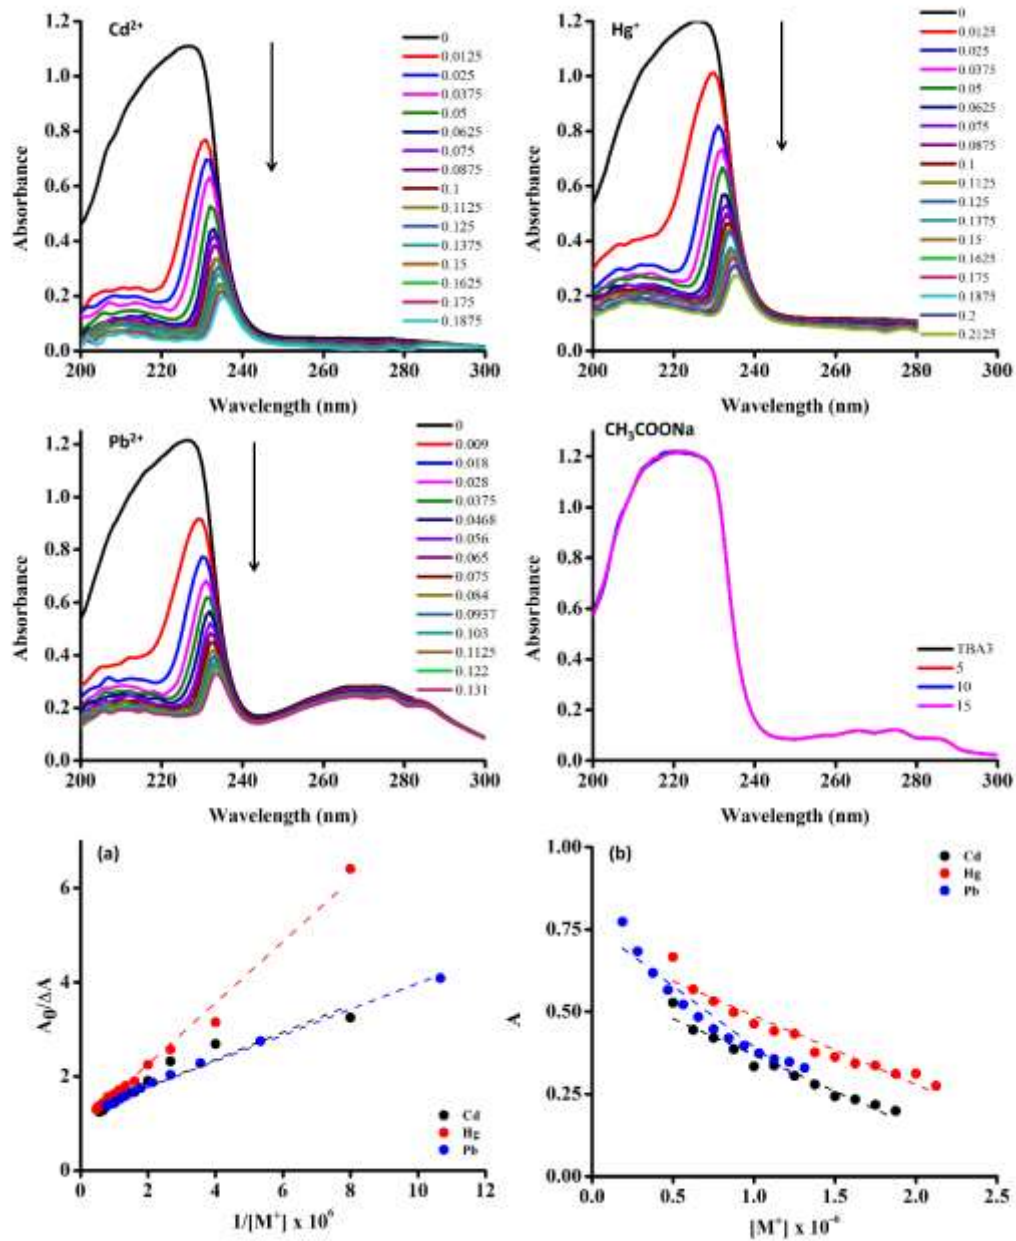

Figure S7 Change in absorbance of **TBA3** with increasing concentrations of cadmium(II), mercury(II) and lead (II), control experiment with sodium acetate; (a) Benesi–Hildebrand plot and (b) detection limit of all metal ions with **TBA3**

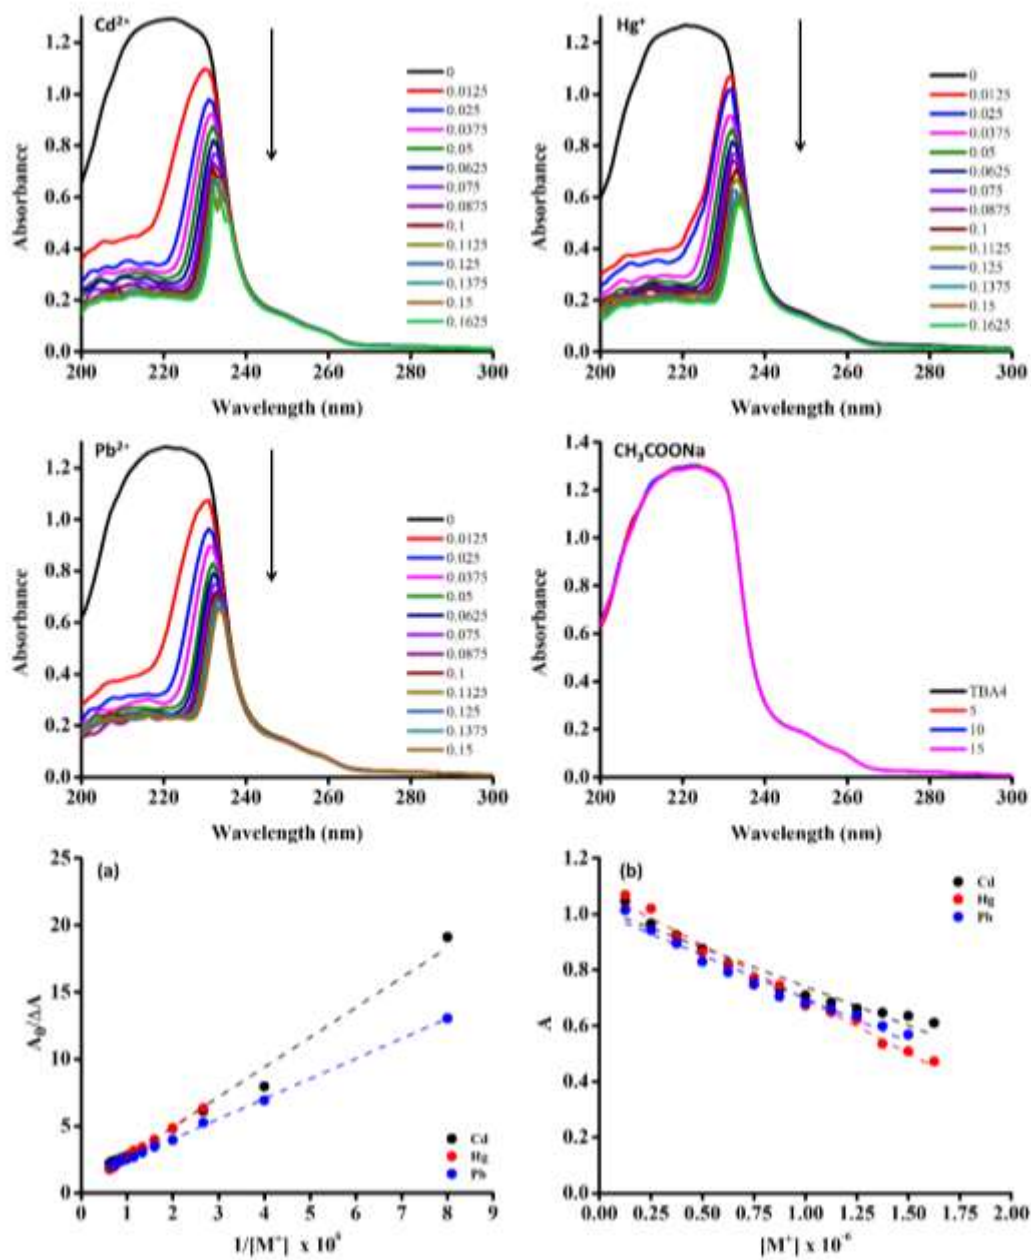

Figure S8 Change in absorbance of **TBA4** with increasing concentrations of cadmium(II), mercury(II) and lead (II), control experiment with sodium acetate; (a) Benesi–Hildebrand plot and (b) detection limit of all metal ions with **TBA4**

### Job's plots

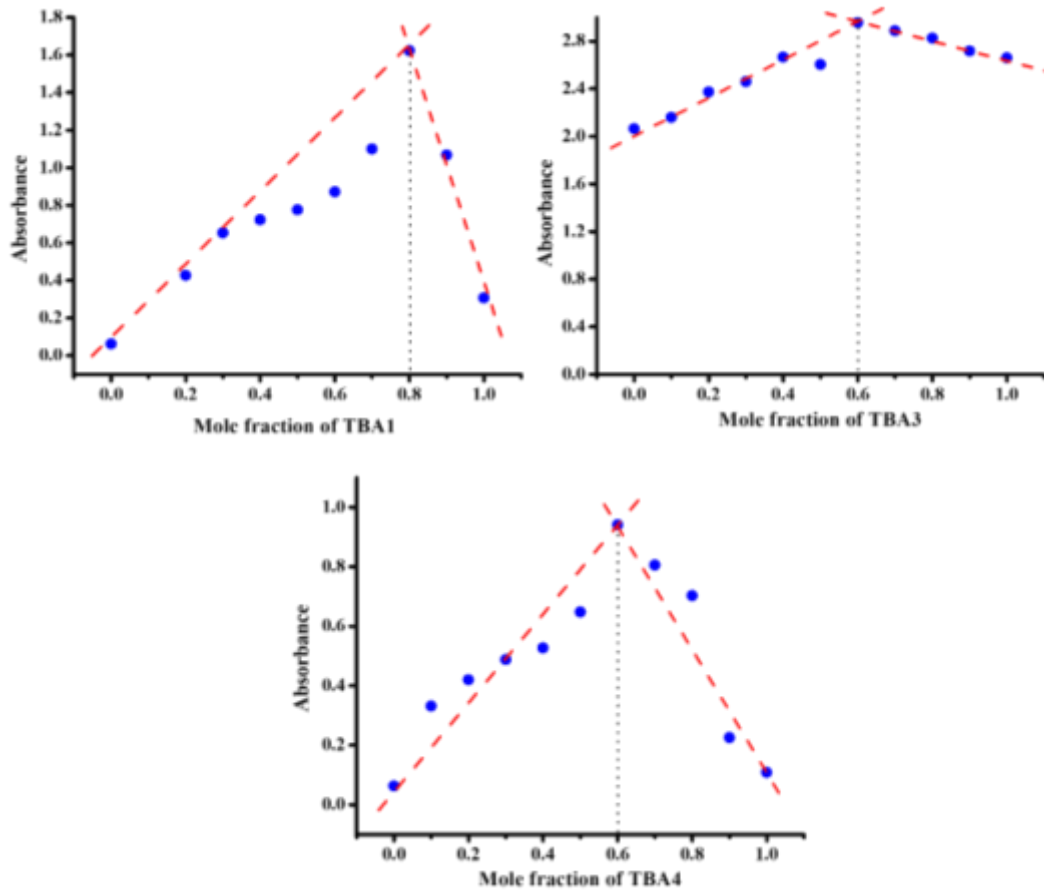

Figure S9 Job's plots for compounds TBA1, TBA3 and TBA4 in presence of mercuric ions

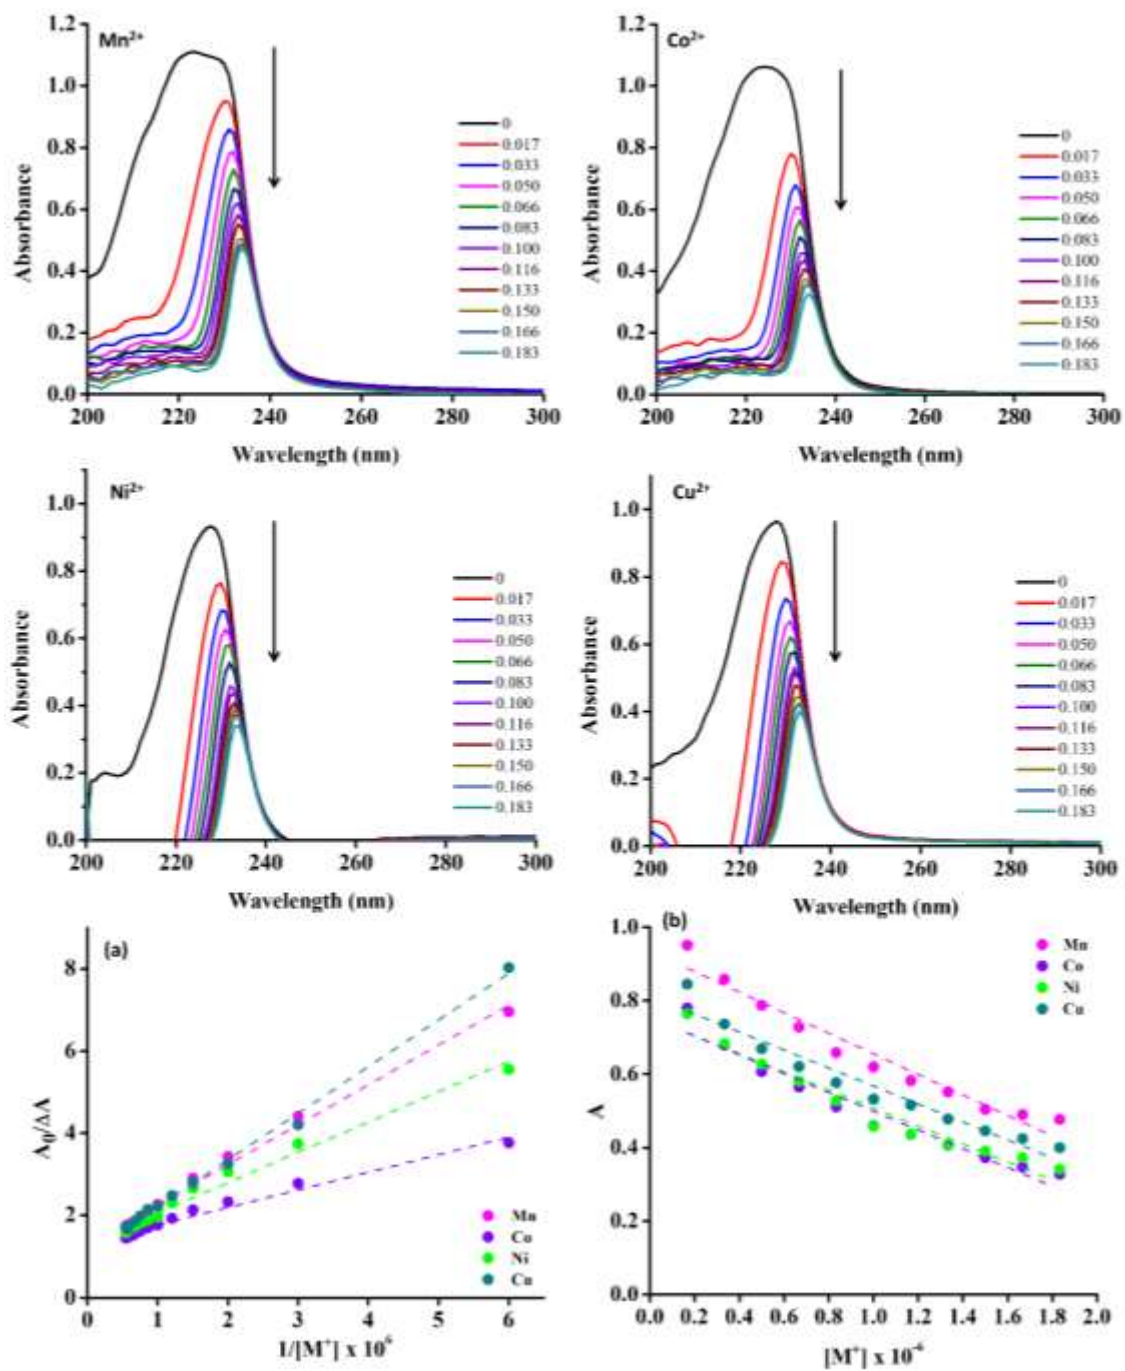

Figure S10 Change in absorbance of **TBA1** with increasing concentrations of manganese(II), cobalt(II), nickel(II) and copper(II) ions, (a) Benesi–Hildebrand plot and (b) detection limit of all metal ions with **TBA1**

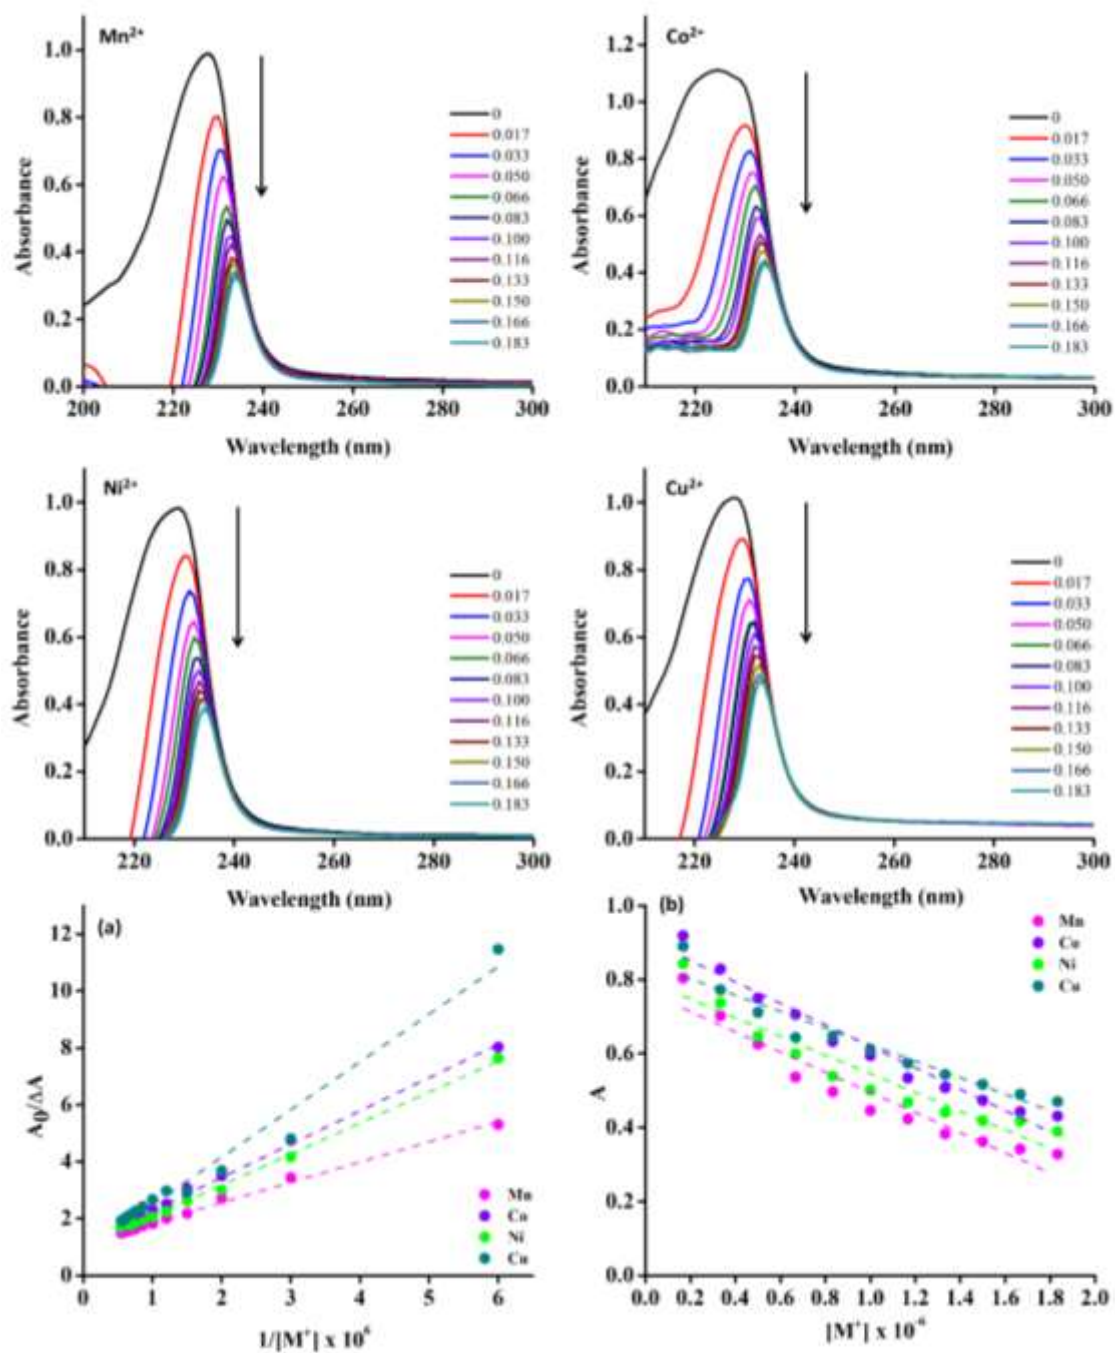

Figure S11 Change in absorbance of **TBA3** with increasing concentrations of manganese(II), cobalt(II), nickel(II) and copper(II) ions, (a) Benesi-Hildebrand plot and (b) detection limit of all metal ions with **TBA3**

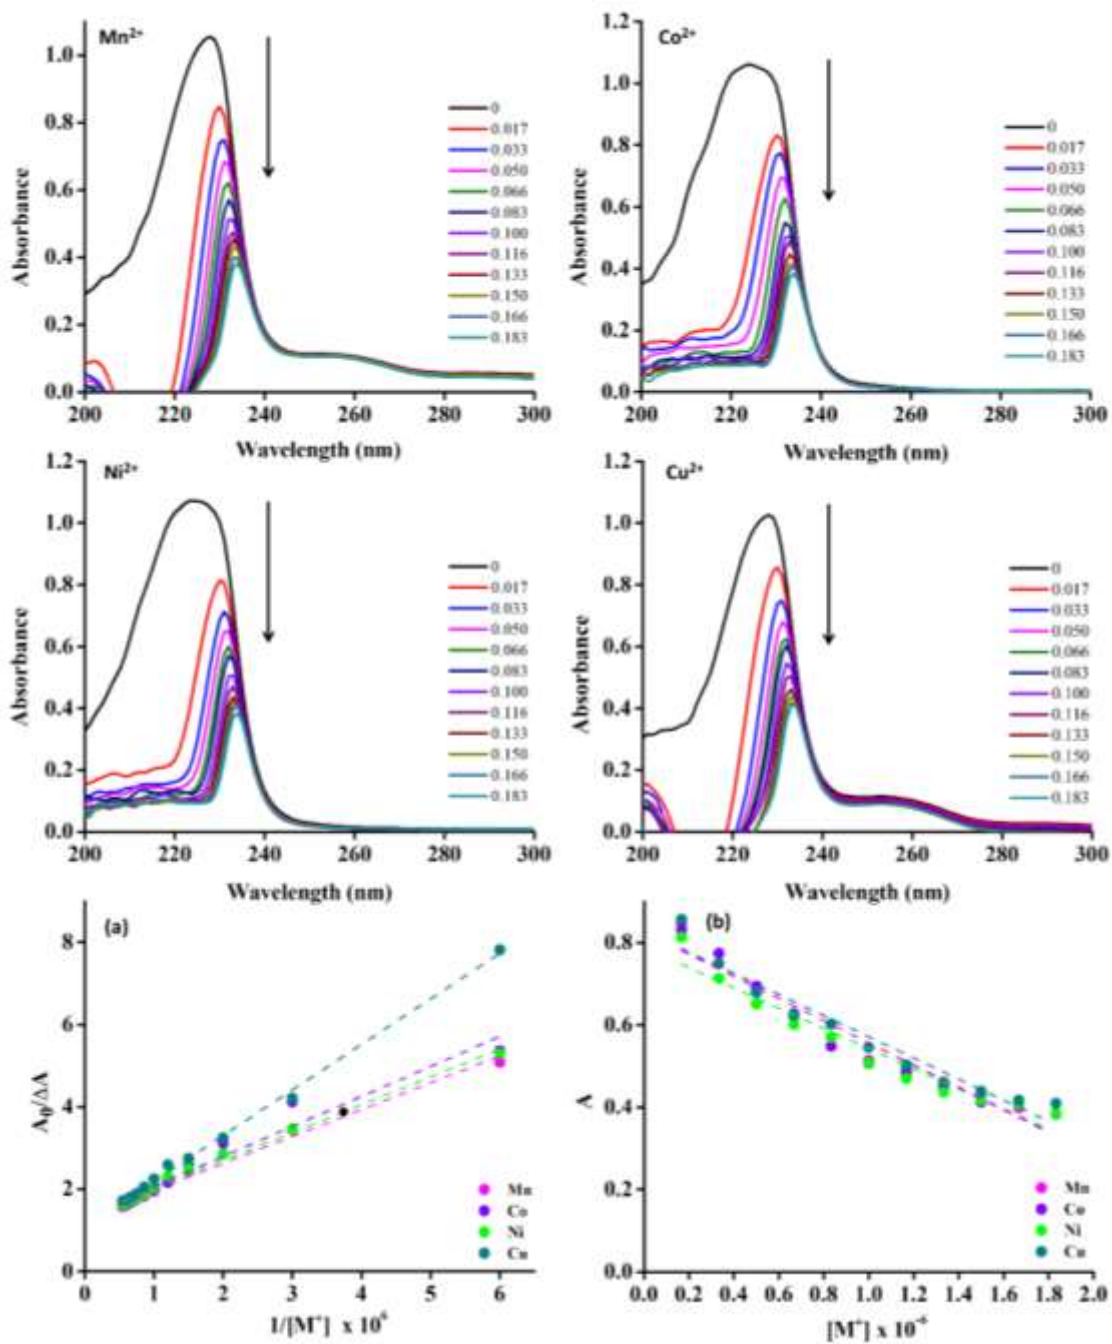

Figure S12 Change in absorbance of TBA4 with increasing concentrations of manganese(II), cobalt(II), nickel(II) and copper(II) ions, (a) Bnesi-Hildebrand plot and (b) detection limit of all metal ions with TBA4

### LOD and Ka values for all the heavy metals tested

Table S2

|    | TBA1                                  |                                        | TBA3                                  |                                        | TBA4                                  |                                        |
|----|---------------------------------------|----------------------------------------|---------------------------------------|----------------------------------------|---------------------------------------|----------------------------------------|
|    | Detection Limit<br>$\times 10^{-6}$ M | $K_a$<br>$\times 10^6$ M <sup>-1</sup> | Detection Limit<br>$\times 10^{-6}$ M | $K_a$<br>$\times 10^6$ M <sup>-1</sup> | Detection Limit<br>$\times 10^{-6}$ M | $K_a$<br>$\times 10^6$ M <sup>-1</sup> |
| Mn | 0.433                                 | 1.345                                  | 0.566                                 | 1.600                                  | 0.462                                 | 2.025                                  |
| Co | 0.441                                 | 3.141                                  | 0.388                                 | 0.944                                  | 0.485                                 | 1.841                                  |
| Ni | 0.431                                 | 1.792                                  | 0.619                                 | 0.911                                  | 0.471                                 | 2.002                                  |
| Cu | 0.468                                 | 0.955                                  | 0.541                                 | 0.484                                  | 0.461                                 | 0.984                                  |



## 1H NMR in presence of metal salts

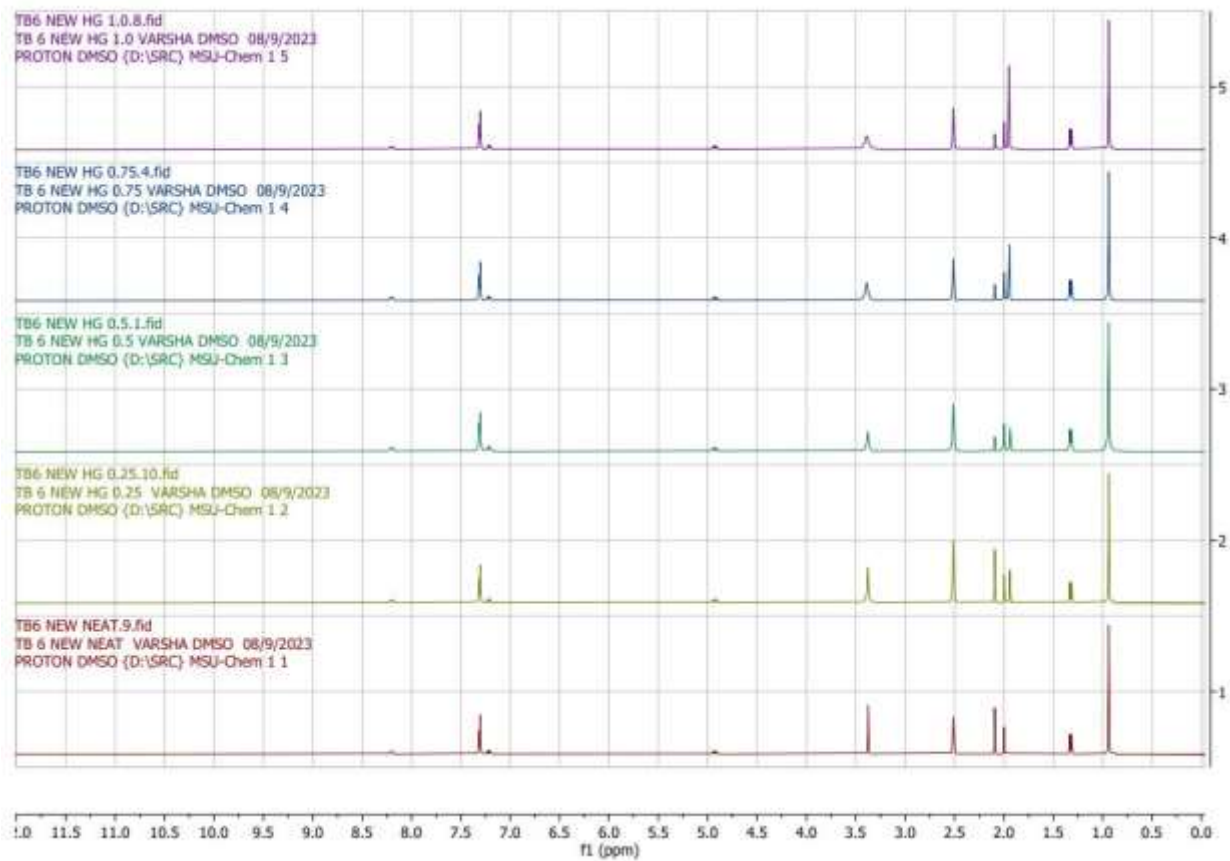

Figure S13 Proton NMR of TBA1 in presence of 0.25, 0.5, 0.75 and 1.0 mole equivalents of mercuric acetate salt in DMSO-d<sub>6</sub>

### FT-IR in presence of mercuric metal salts

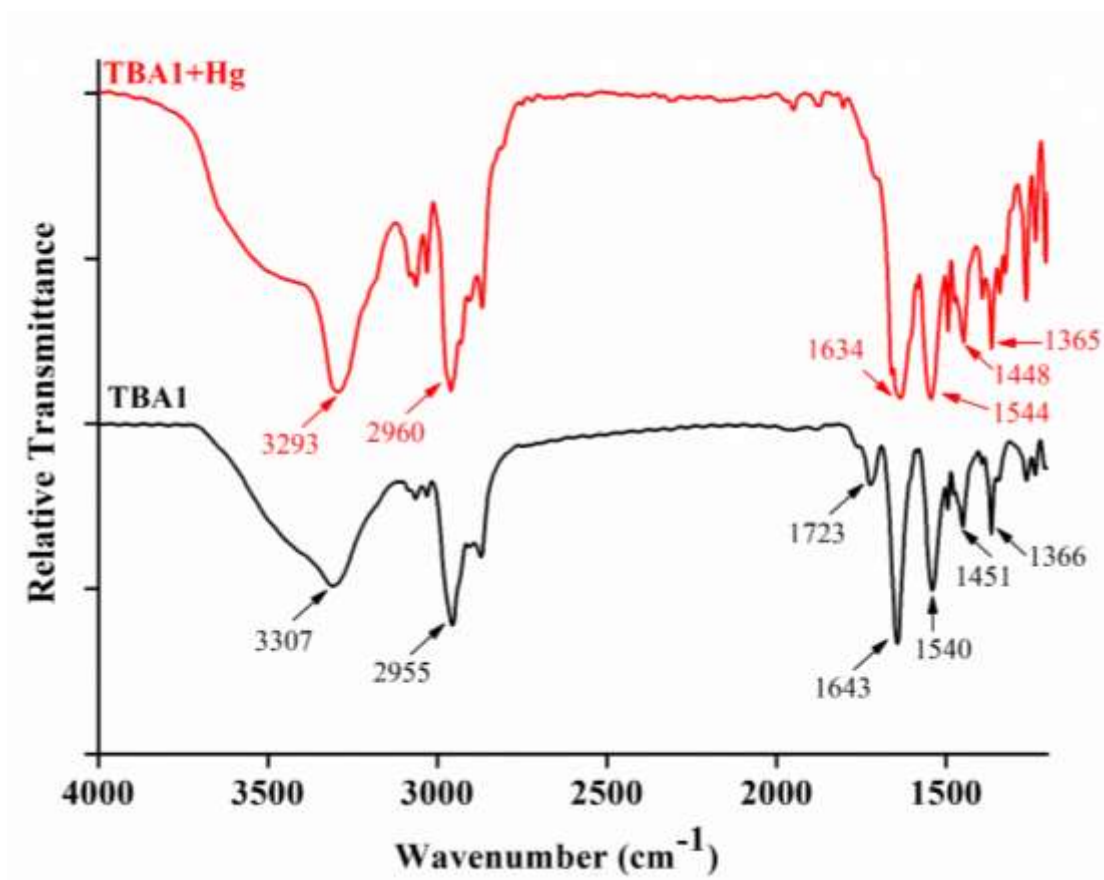

Figure S14 FT-IR of **TBA1** in presence of mercuric acetate salt in THF

## Rheology

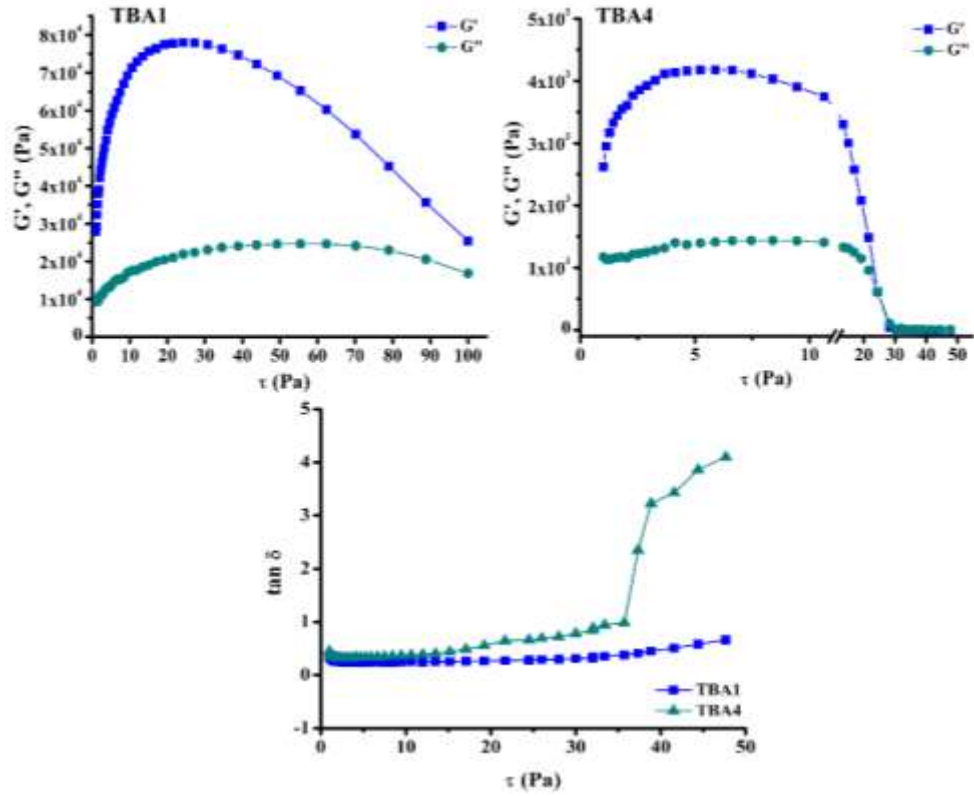

Figure S15 Rheological behavior of the gels in diesel and trends in  $\tan \delta$  values

Comparative IR spectra of Compound TB1 with xerogel, gel solution phase (solvent used – n-octane)

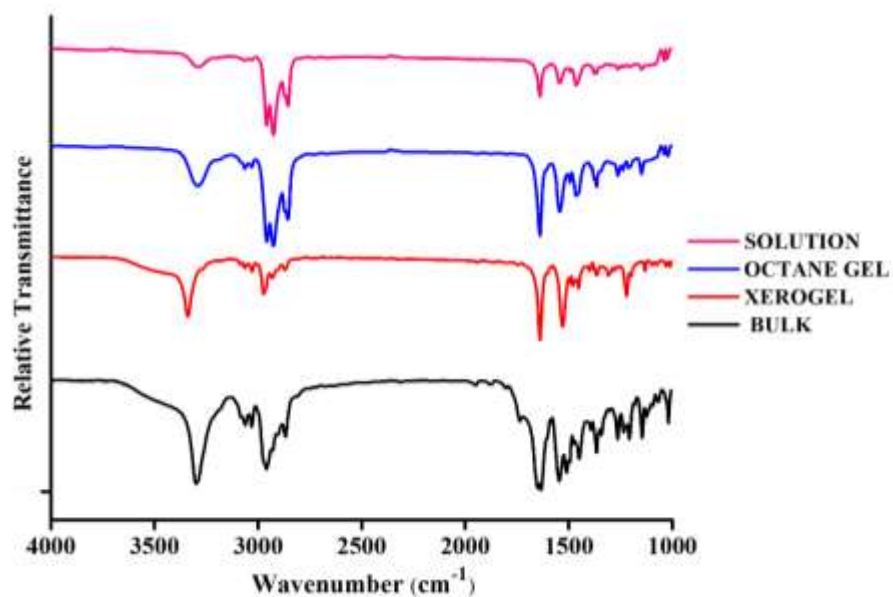

Figure S16 Comparison of FT-IR spectra between different forms of TBA1

### Comparative PXRD patterns

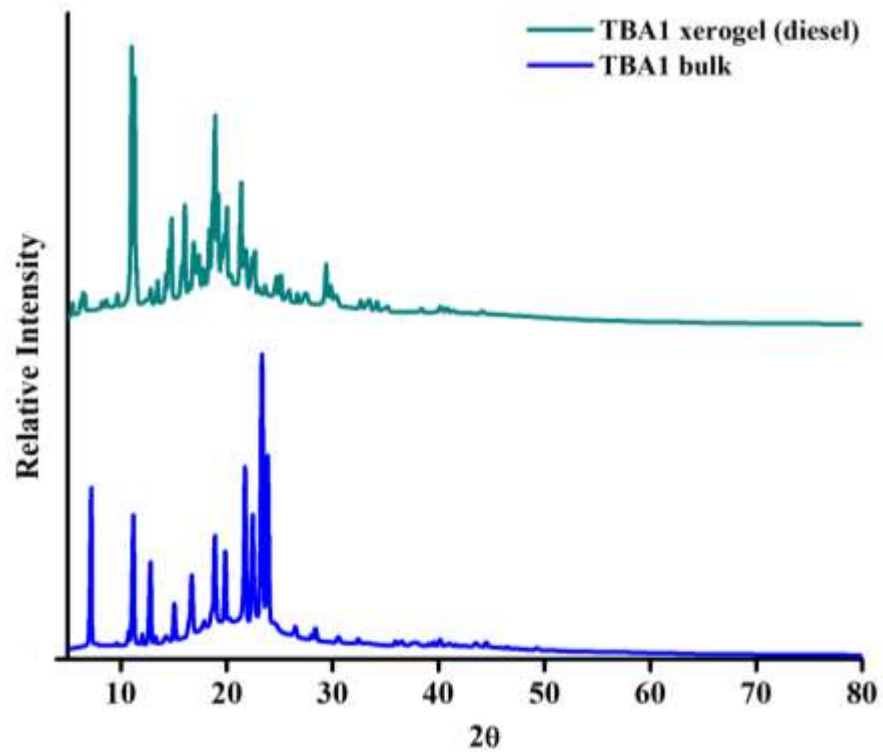

Figure S17 Comparative PXRD spectra of **TBA1**

## Crystallographic Parameters

Table S3

|                                                   |                                                               |
|---------------------------------------------------|---------------------------------------------------------------|
| <b>Code</b>                                       | <b>TBA4</b>                                                   |
| <b>Empirical formula</b>                          | C <sub>48</sub> H <sub>92</sub> N <sub>4</sub> O <sub>4</sub> |
| <b>Formula weight</b>                             | 789.25                                                        |
| <b>Temperature/K</b>                              | 140.00                                                        |
| <b>Crystal system</b>                             | monoclinic                                                    |
| <b>Space group</b>                                | <i>P2<sub>1</sub>/c</i>                                       |
| <b>a/Å</b>                                        | 23.20(3)                                                      |
| <b>b/Å</b>                                        | 10.861(13)                                                    |
| <b>c/Å</b>                                        | 10.066(13)                                                    |
| <b>α/°</b>                                        | 90                                                            |
| <b>β/°</b>                                        | 90.07(4)                                                      |
| <b>γ/°</b>                                        | 90                                                            |
| <b>Volume/Å<sup>3</sup></b>                       | 2537(6)                                                       |
| <b>Z</b>                                          | 2                                                             |
| <b>ρ<sub>calc</sub>/g/cm<sup>3</sup></b>          | 1.033                                                         |
| <b>μ/mm<sup>-1</sup></b>                          | 0.064                                                         |
| <b>F(000)</b>                                     | 880.0                                                         |
| <b>Crystal size/mm<sup>3</sup></b>                | 0.7 x 0.5 x 0.3                                               |
| <b>Radiation</b>                                  | MoKα (λ = 0.71073)                                            |
| <b>2θ range for data collection/°</b>             | 4.14 to 50.49                                                 |
| <b>Index ranges</b>                               | -27 ≤ h ≤ 27, -12 ≤ k ≤ 12, -11 ≤ l ≤ 9                       |
| <b>Reflections collected</b>                      | 14743                                                         |
| <b>Independent reflections</b>                    | 4443 [R <sub>int</sub> = 0.2156, R <sub>sigma</sub> = 0.2625] |
| <b>Data/restraints/parameters</b>                 | 4443/0/260                                                    |
| <b>Goodness-of-fit on F<sup>2</sup></b>           | 0.867                                                         |
| <b>Final R indexes [I &gt;= 2σ (I)]</b>           | R <sub>1</sub> = 0.0771, wR <sub>2</sub> = 0.1694             |
| <b>Final R indexes [all data]</b>                 | R <sub>1</sub> = 0.2538, wR <sub>2</sub> = 0.2612             |
| <b>Largest diff. peak/hole / e Å<sup>-3</sup></b> | 0.17/-0.17                                                    |
| <b>CCDC No.</b>                                   | 2221607                                                       |

## Analytical Data

**Compound TBA1 (N-(1-phenylethyl)-3,3-dimethylbutanamide).** M.P.= 60°C, <sup>1</sup>H NMR (400 MHz, CDCl<sub>3</sub>, TMS) = δ (ppm) 7.766-7.322 (*m*, 5H, 5(CH) ar), δ 5.660 (*s*, 1H, -CONH), δ 5.199-5.051 (*m*, 1H, (CH)), δ 2.063 (*s*, 2H, CH<sub>2</sub>), δ 1.579-1.562 (*d*, 1H, CH), δ 1.517-1.499(*d*, 3H, CH<sub>3</sub>), 1.040 (*s*, 9H, 3(CH<sub>3</sub>)). <sup>13</sup>C = δ (ppm) 171, 159, 143, 142, 128, 127, 126, 50, 49, 48, 31, 29, 21.

FT-IR, cm<sup>-1</sup> (KBr) – 3299, 3062, 3031, 2960, 2808, 1736, 1634, 1545, 1510, 1449, 1393, 1385, 1342, 1263, 1234, 1207, 1145, 1018, 907, 763, 697, 623, 541.

**Compound TBA2 (N-(3-ethynylphenyl)-3,3-dimethylbutanamide).** M.P.= 98°C, <sup>1</sup>H NMR (400 MHz, CDCl<sub>3</sub>, TMS) = δ (ppm) 7.654 (*s*, 1H, (CH) ar), δ 7.572-7.553 (*d*, 1H, (CH) ar), δ 7.299-7.215 (*m*, 2H, 2(CH) ar), δ 3.077 (*s*, 1H, ≡CH), δ 2.237 (*s*, 2H, CH<sub>2</sub>), δ 1.114 (*s*, 9H, 3(CH<sub>3</sub>)). <sup>13</sup>C = δ (ppm) 170, 137, 129, 127, 123, 122, 120, 83, 51, 31, 29.

FT-IR, cm<sup>-1</sup> (KBr) – 3431, 3292, 3067, 2961, 2361, 1651, 1580, 1554, 1474, 1419, 1366, 1337, 1277, 1152, 1132, 1041, 976, 954, 885, 793, 763, 690, 665, 633.

**Compound TBA3 (N-(1-benzylpiperidin-4-yl)-3,3-dimethylbutanamide).** M.P.= 96°C, <sup>1</sup>H NMR (400 MHz, CDCl<sub>3</sub>, TMS) = δ (ppm) 7.330-7.264 (*m*, 5H, 5(CH) ar), δ 5.311-5.292 (*d*, 1H, -CONH), δ 3.861-3.786 (*m*, 1H, (CH)), δ 3.500 (*s*, 2H, CH<sub>2</sub>), δ 2.839-2.811 (*d*, 2H, 2(CH<sub>2</sub>)), δ 2.149-2.095 (*m*, 2H, 2(CH<sub>2</sub>)), δ 2.026 (*s*, 2H, CH<sub>2</sub>), δ 1.932-1.905 (*m*, 2H, 2(CH<sub>2</sub>)), δ 1.502-1.405 (*m*, 2H, 2(CH<sub>2</sub>)), δ 1.031 (*s*, 9H, 3(CH<sub>3</sub>)). <sup>13</sup>C = δ (ppm) 171, 138, 129, 128, 127, 63, 52, 50, 48, 46, 35, 32, 30, 29.

FT-IR, cm<sup>-1</sup> (KBr) – 3290, 3082, 3029, 2955, 2866, 2802, 1634, 1554, 1493, 1448, 1393, 1364, 1273, 1245, 1201, 1154, 1141, 1092, 1028, 863, 791, 743, 731, 698, 643.

**Compound TBA4 (N-cyclohexyl-3,3-dimethylbutanamide).** M.P.= 88°C, <sup>1</sup>H NMR (400 MHz, CDCl<sub>3</sub>, TMS) = δ (ppm) 5.478 (*s*, 1H, -CONH), δ 3.756-3.713 (*m*, 1H, (CH)), δ 1.987 (*s*, 2H, CH<sub>2</sub>), δ 1.898-1.859 (*m*, 2H, 2(CH<sub>2</sub>)), δ 1.734-1.380 (*m*, 2H, 2(CH<sub>2</sub>)), δ 1.372-1.342 (*m*, 1H, CH<sub>2</sub>), δ 1.333-1.101 (*m*, 2H, 2(CH<sub>2</sub>)), δ 1.081-1.036 (*m*, 3H, 3(CH<sub>2</sub>)), δ 0.997 (*s*, 9H, 3(CH<sub>3</sub>)). <sup>13</sup>C = δ (ppm) 170, 159, 50, 48, 47, 33, 32, 30, 29, 25, 24.

FT-IR, cm<sup>-1</sup> (KBr) – 3307, 3077, 2952, 2933, 2853, 1637, 1547, 1447, 1365, 1346, 1300, 1273, 1256, 1239, 1202, 1153, 1100, 993, 891, 719, 622, 554.

**Compound TBA5 (N-hexadecyl-3,3-dimethylbutanamide).** M.P.= 54°C, <sup>1</sup>H NMR (400 MHz, CDCl<sub>3</sub>, TMS) = δ (ppm) 5.431 (s, 1H, -CONH), δ 3.261-3.211 (m, 2H, CH<sub>2</sub>), δ 2.042 (s, 2H, CH<sub>2</sub>), δ 1.55-1.45 (m, 2H, CH<sub>2</sub>), δ 1.288-1.258 (m, 28H, 14(CH<sub>2</sub>)), δ 1.039 (s, 9H, 3(CH<sub>3</sub>)), δ 0.886 (t, 3H, CH<sub>3</sub>). <sup>13</sup>C = δ (ppm) 171, 50, 39, 31, 30, 29.8-29.3, 26.9, 22, 14.

FT-IR, cm<sup>-1</sup> (KBr) – 3301, 3062, 2915, 2849, 1633, 1543, 1474, 1393, 1365, 1333, 1265, 1232, 1201, 1145, 1039, 958, 716, 659, 620.

**Compound TBA6 (N-dodecyl-3,3-dimethylbutanamide).** M.P.= 43°C, <sup>1</sup>H NMR (400 MHz, CDCl<sub>3</sub>, TMS) = δ (ppm) 5.409 (s, 1H, -CONH), δ 3.264-3.214 (m, 2H, CH<sub>2</sub>), δ 2.717-2.683 (m, 2H, CH<sub>2</sub>), δ 2.042 (s, 2H, CH<sub>2</sub>), δ 1.511-1.264 (m, 20H, 10(CH<sub>2</sub>)), δ 1.042 (s, 9H, 3(CH<sub>3</sub>)), δ 0.905-0.871 (t, 3H, CH<sub>3</sub>). <sup>13</sup>C = δ (ppm) 171, 50, 42, 39, 33, 31, 30, 29.8-29.2, 26, 22, 14.

FT-IR, cm<sup>-1</sup> (KBr) – 3301, 2955, 2919, 2851, 1634, 1544, 1469, 1365, 1344, 1265, 1233, 1149, 817, 718, 663, 619.



$^1\text{H}$ ,  $^{13}\text{C}$  NMR

TBA1

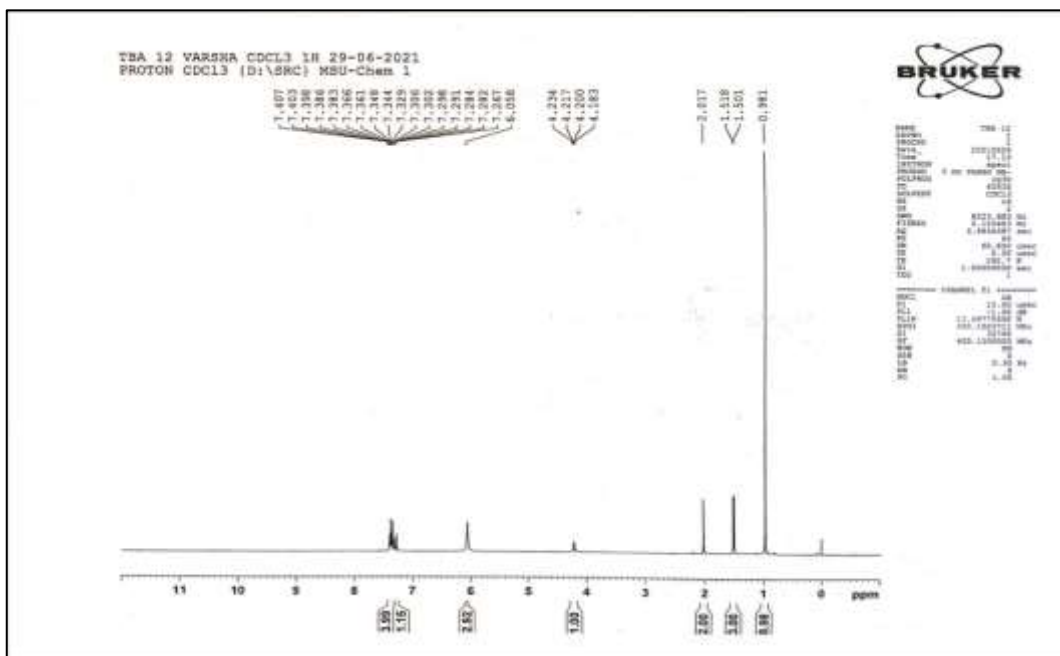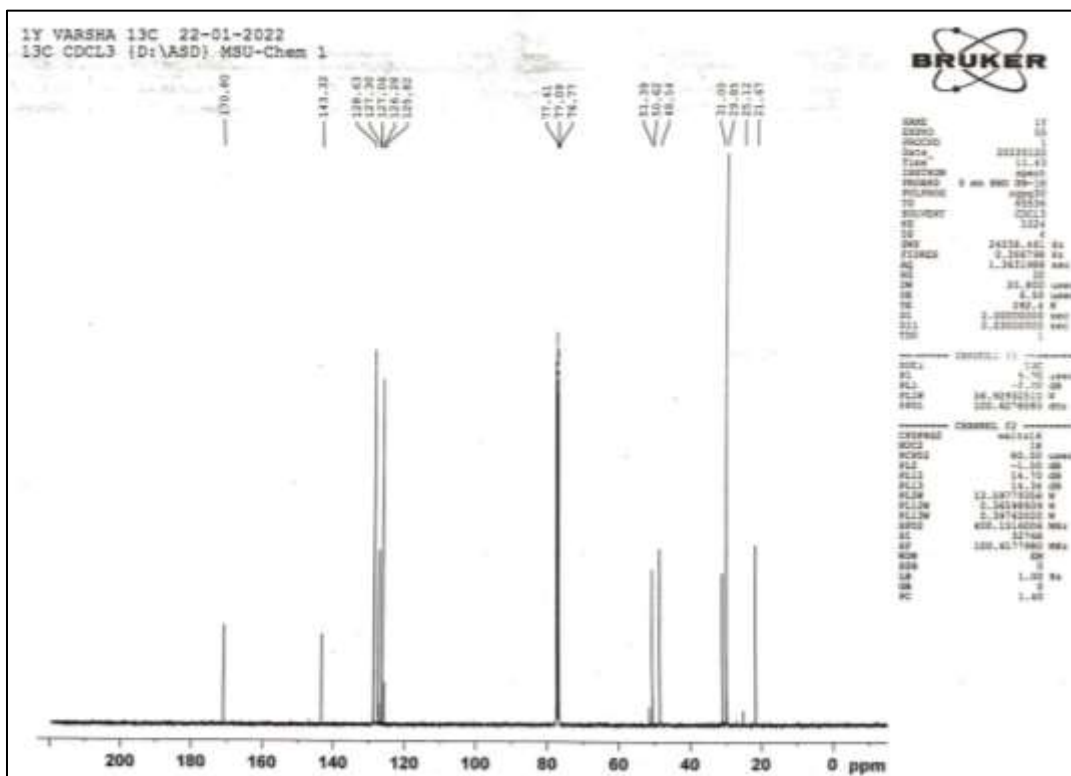

TBA2

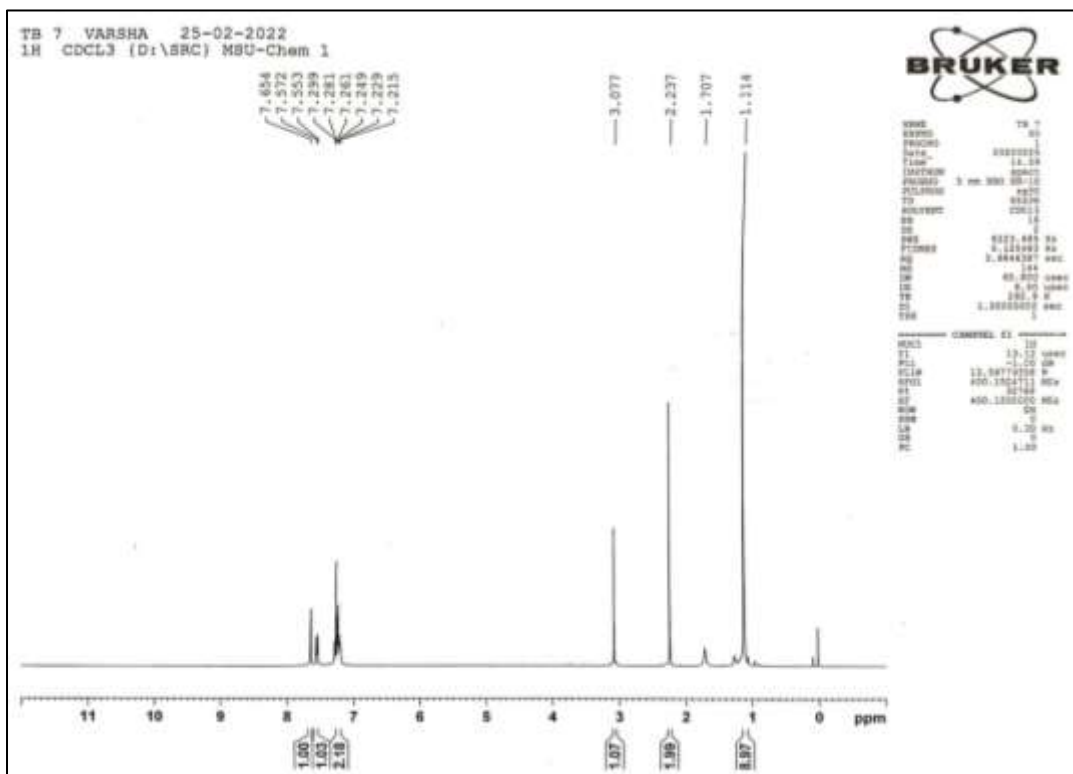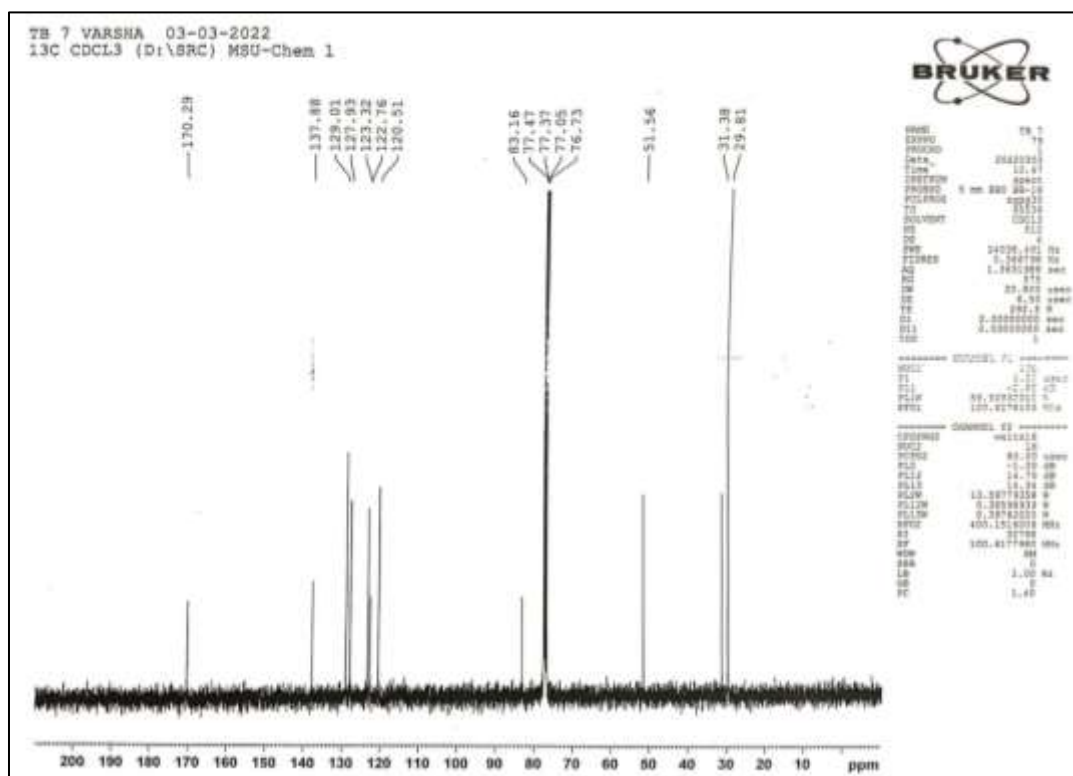

TBA3

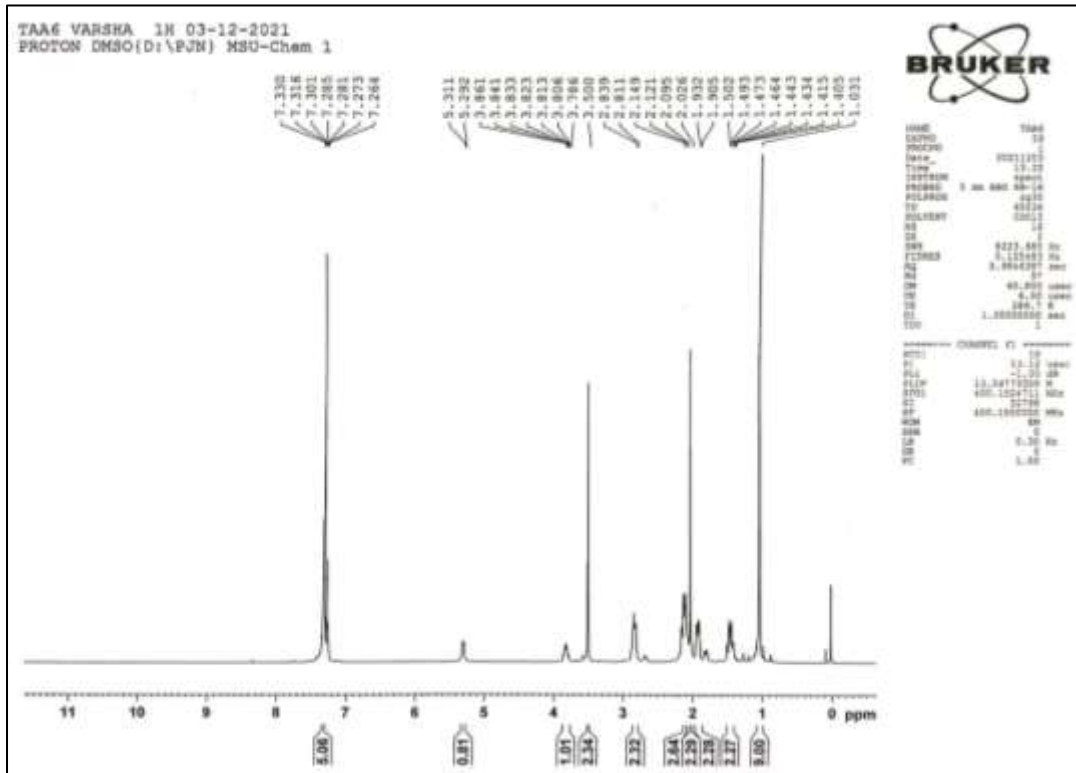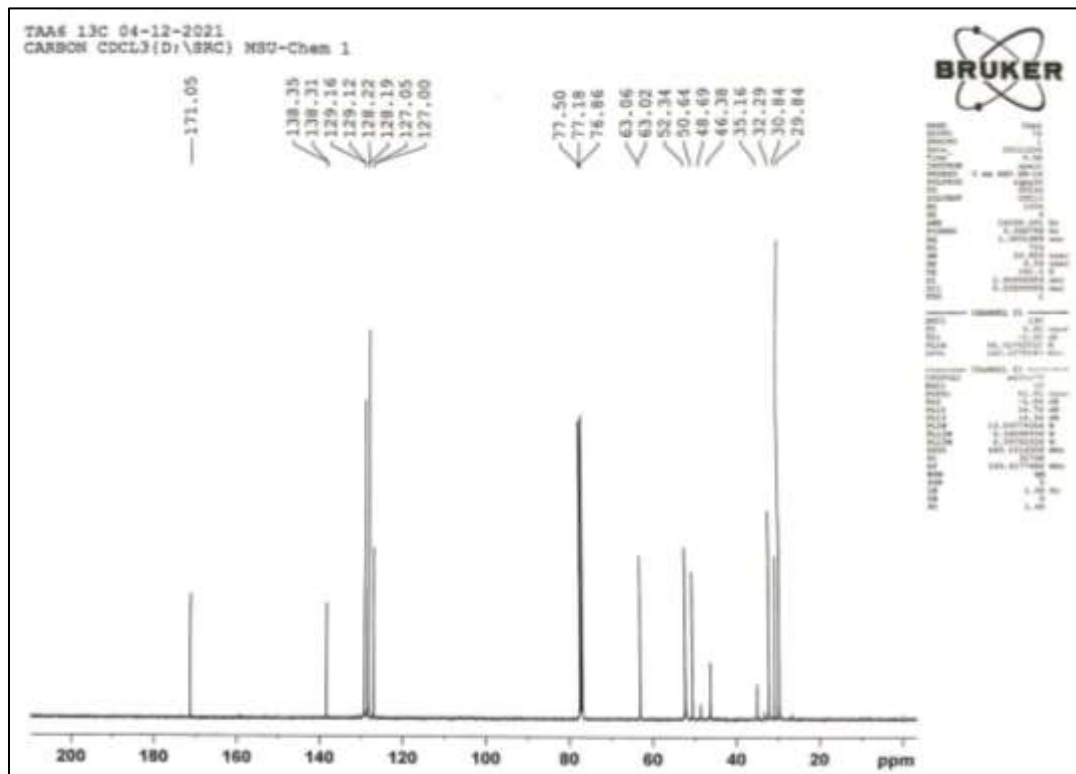

TBA4

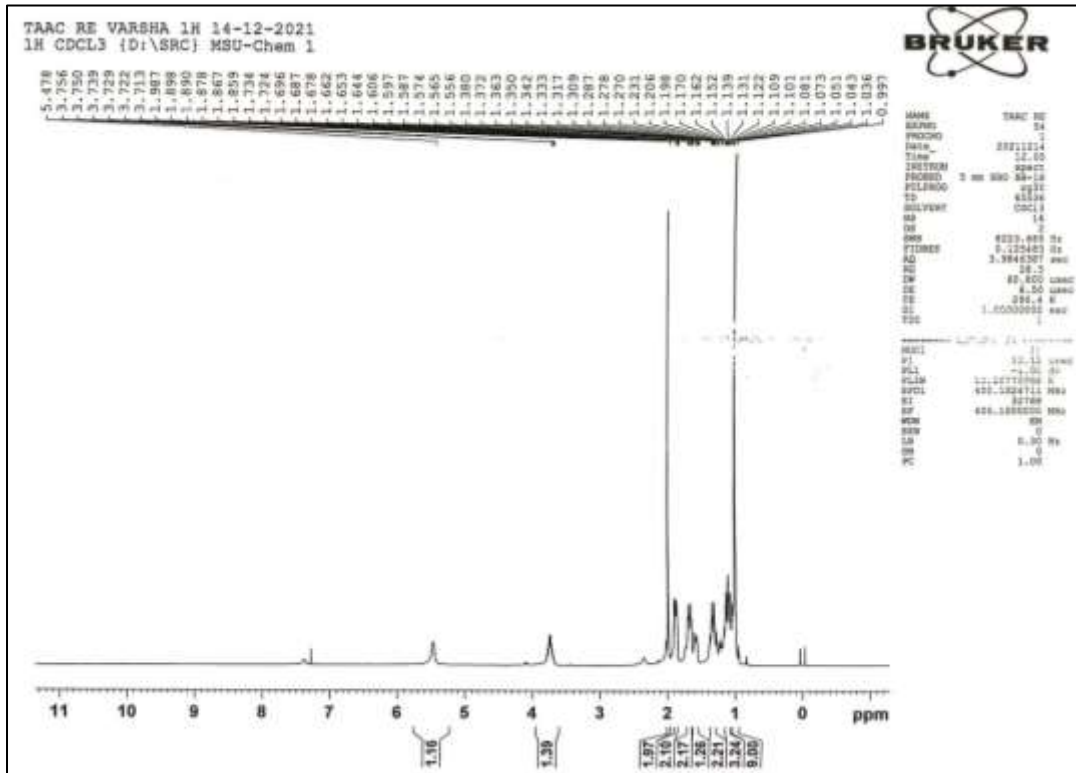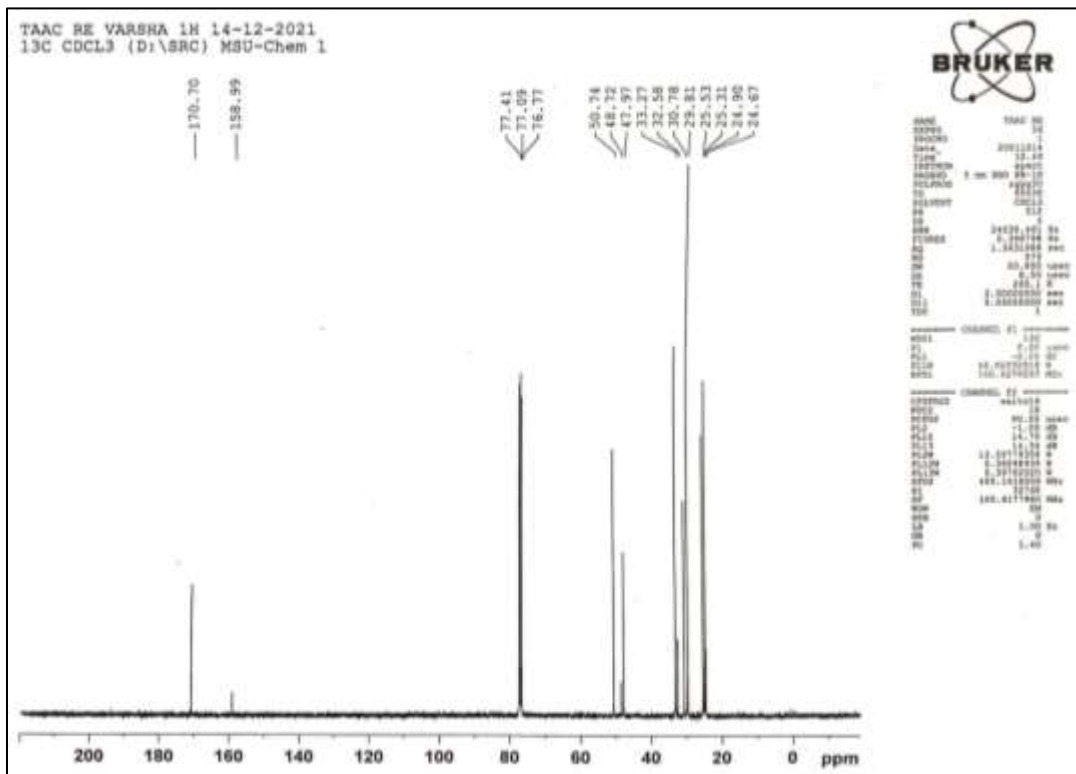

TBA5

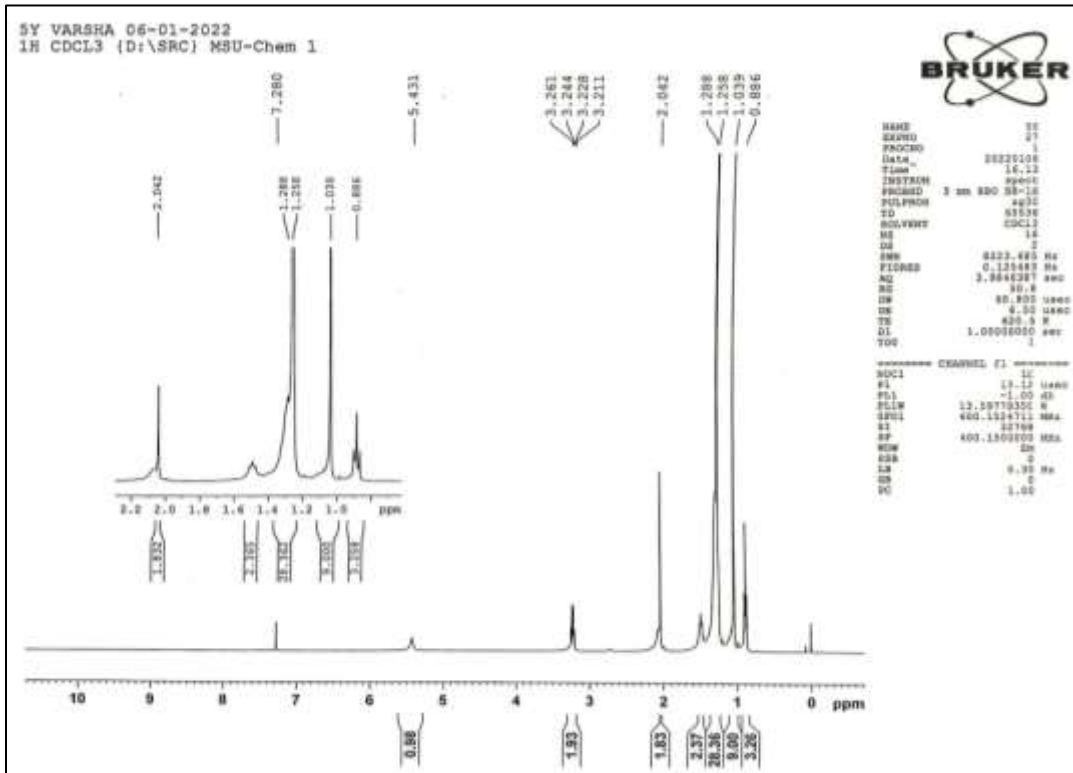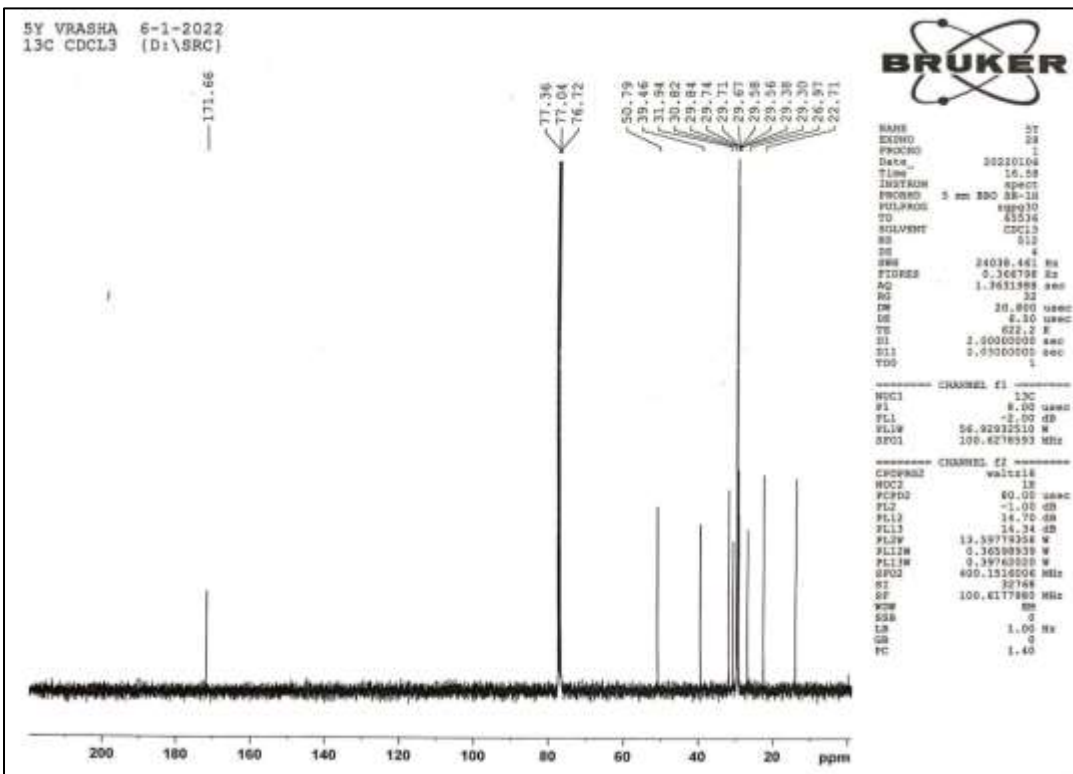

TBA6

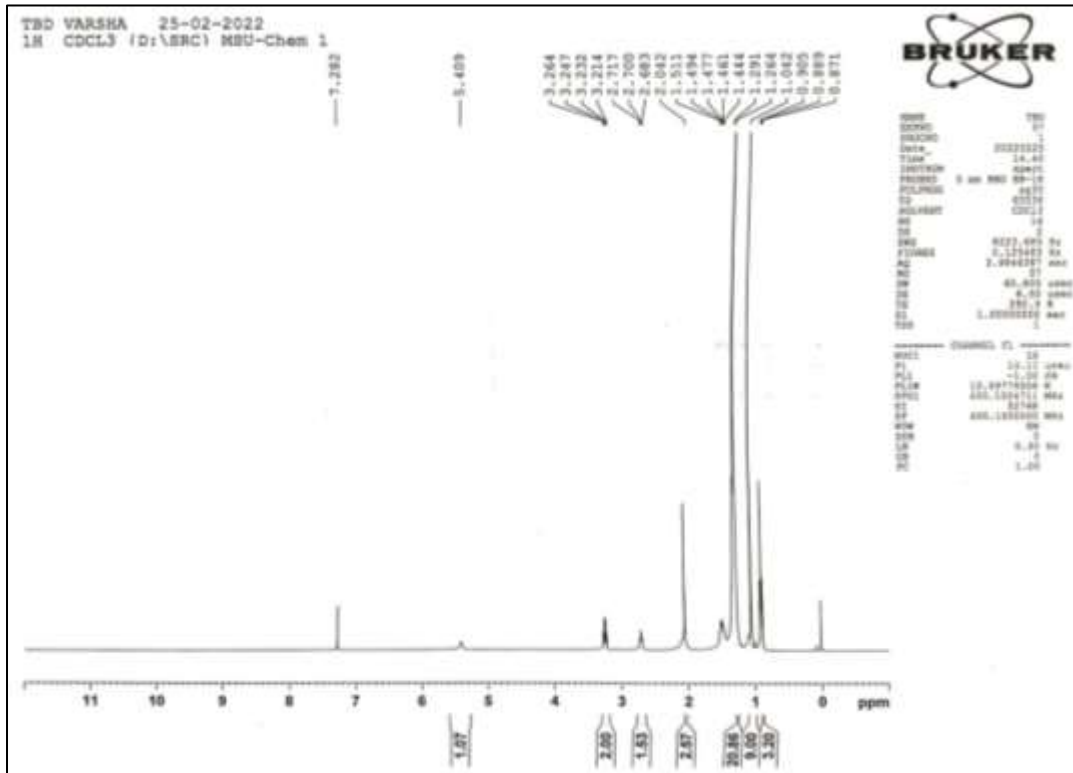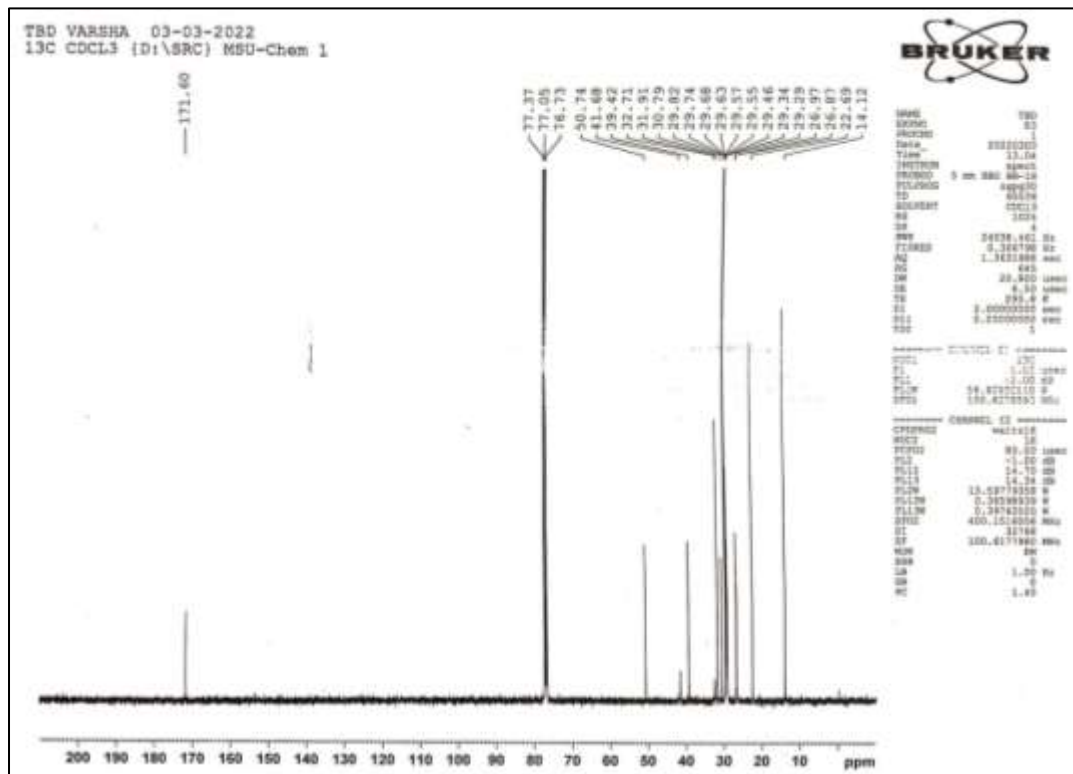

FT-IR  
TBA1

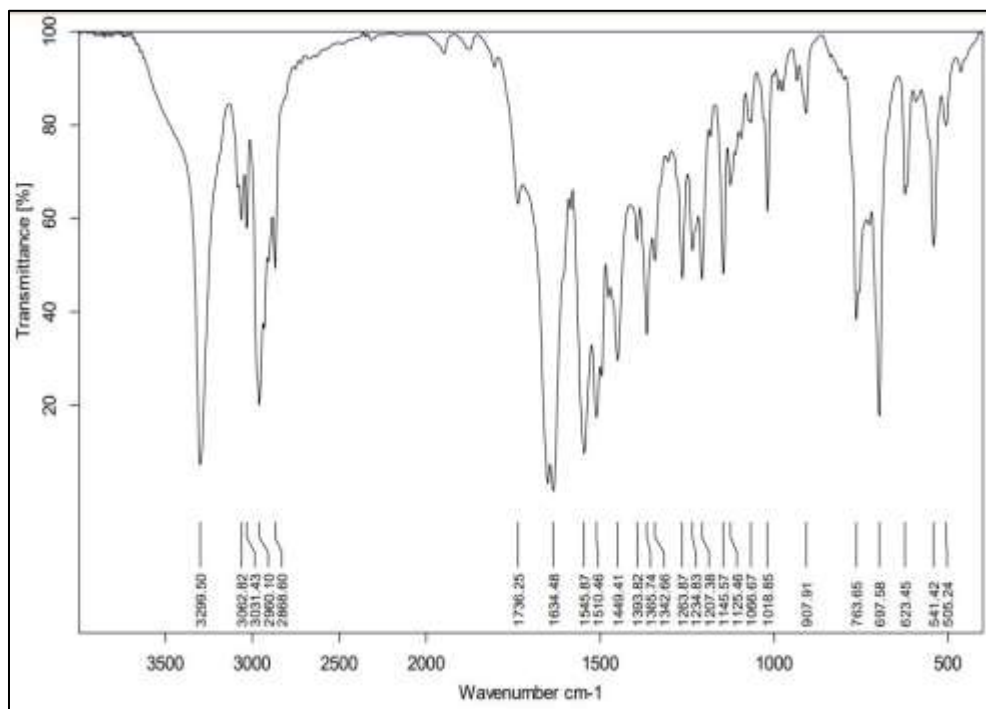

TBA2

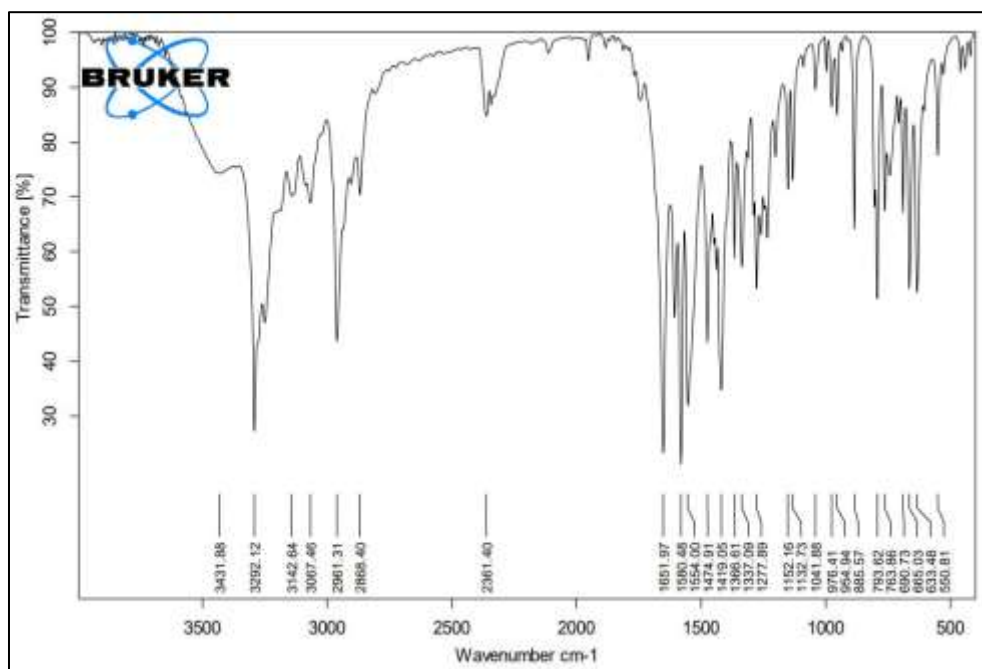

### TBA3

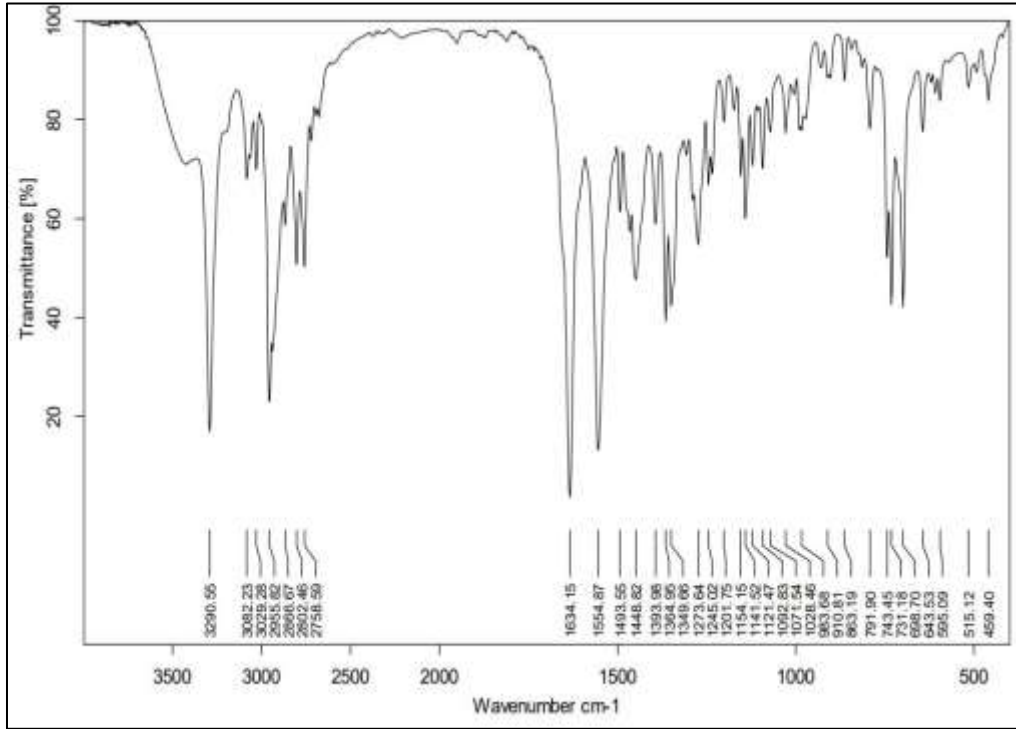

### TBA4

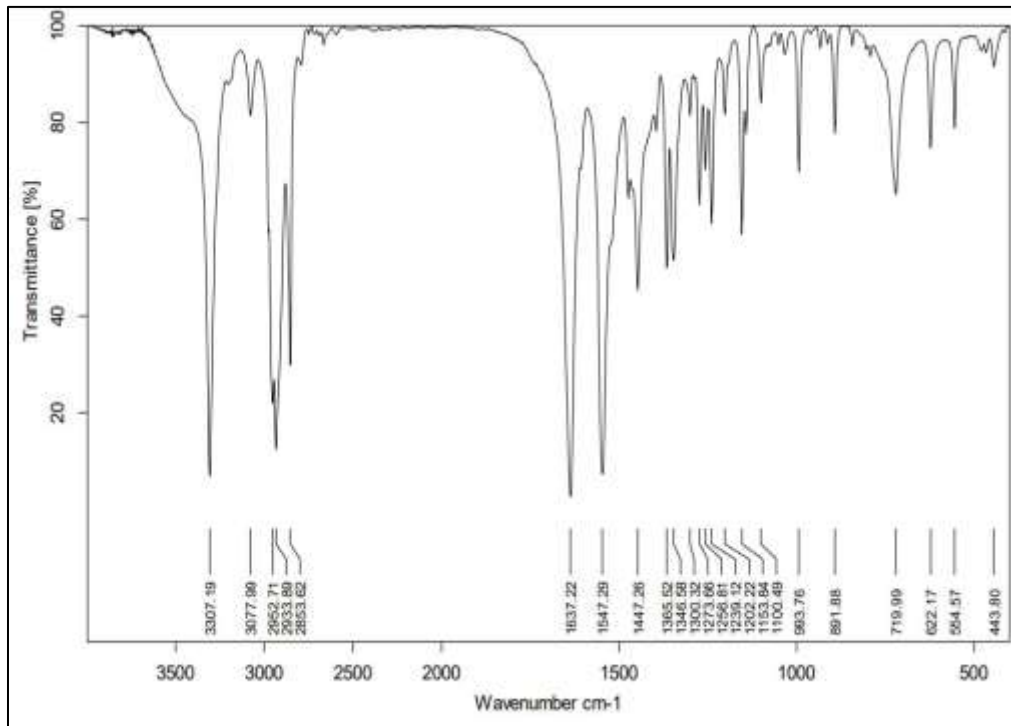



### TBA5

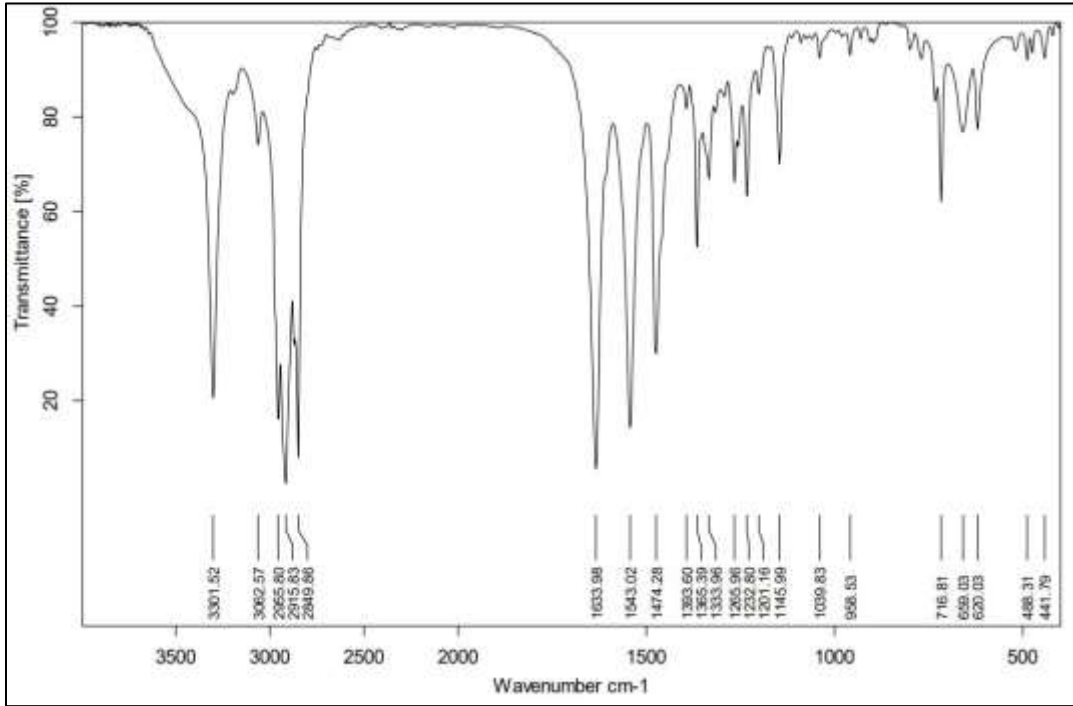

### TBA6

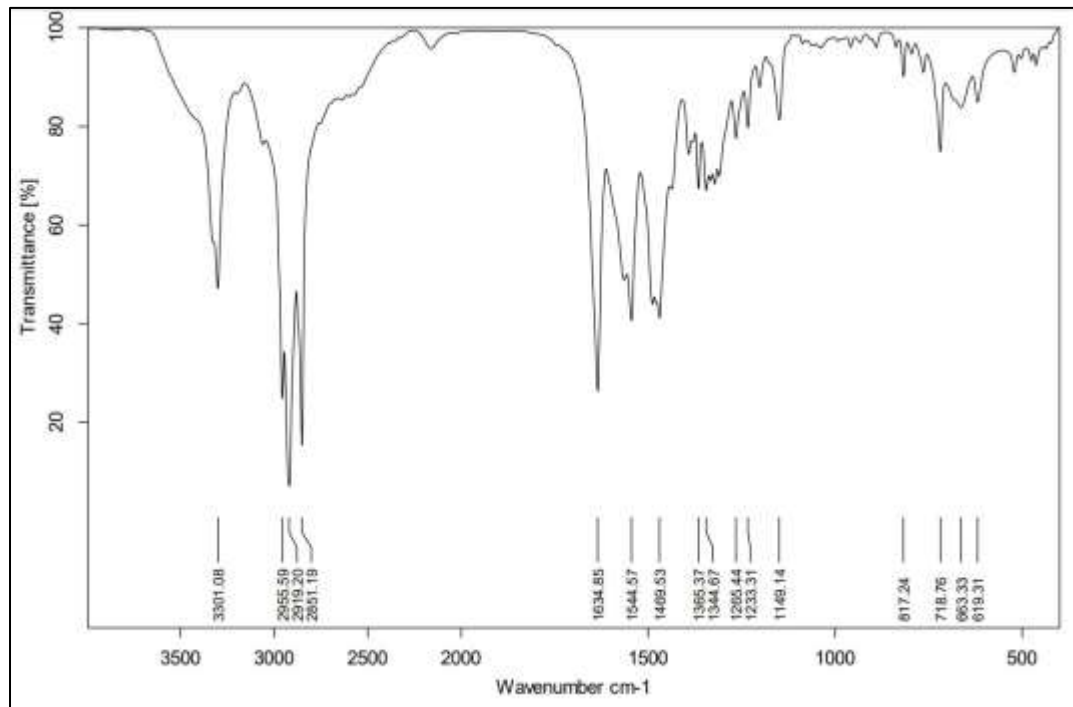

Supplement: d3sm00960b1.pdf [file d3sm00960b1.pdf]
